# Supplementary material for: Merging photoredox catalysis with Lewis acid catalysis: activation of carbon–carbon triple bonds
Source: Royal Society of Chemistry journal article supplement (doi:10.1039/c6cc03725a), 2016-01-01
Supplement: c6cc03725a1.pdf [file c6cc03725a1.pdf]

**Merging Photoredox Catalysis with Lewis Acid Catalysis: Activation of  
Carbon-Carbon Triple Bond**

Ruiwen Jin, Yiyong Chen, Wangsheng Liu, Dawen Xu, Yawei Li, Aishun Ding, Hao Guo\*

Department of Chemistry, Fudan University, 220 Handan Road, Shanghai, 200433, P.  
R. China. Tel: +86-21-55664361, Fax: +86-21-55664361, E-mail:  
Hao\_Guo@fudan.edu.cn

**Electronic Supplementary Information**

|                      |     |
|----------------------|-----|
| Table S1             | S2  |
| Scheme S1            | S4  |
| Experimental Section | S5  |
| NMR Spectra          | S24 |
| References           | S49 |

**Table S1. Optimization of reaction conditions.<sup>a</sup>**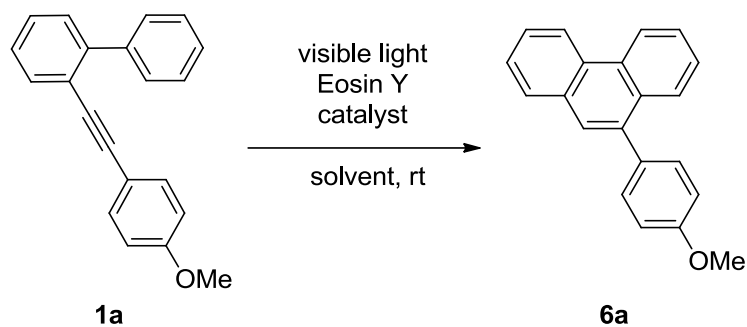

| Entry           | Solvent      | Eosin Y (mol%) | Cat. (mol%)                | Time (h) | NMR yield (%) <sup>b</sup> |
|-----------------|--------------|----------------|----------------------------|----------|----------------------------|
| 1               | acetone      | 100            | Cu(OTf) <sub>2</sub> (100) | 9        | NR (>99) <sup>c</sup>      |
| 2               | methanol     | 100            | Cu(OTf) <sub>2</sub> (100) | 9        | NR (99) <sup>c</sup>       |
| 3               | DMF          | 100            | Cu(OTf) <sub>2</sub> (100) | 9        | NR (>99) <sup>c</sup>      |
| 4               | acetonitrile | 100            | Cu(OTf) <sub>2</sub> (100) | 10       | 93                         |
| 5               | DCM          | 100            | Cu(OTf) <sub>2</sub> (100) | 9        | >99                        |
| 6               | DCM          | 20             | Cu(OTf) <sub>2</sub> (100) | 6        | >99                        |
| 7               | DCM          | 3              | Cu(OTf) <sub>2</sub> (100) | 6        | >99                        |
| 8               | DCM          | 0              | Cu(OTf) <sub>2</sub> (100) | 6        | 5 (91) <sup>c</sup>        |
| 9               | DCM          | 3              | Cu(OTf) <sub>2</sub> (20)  | 6        | >99                        |
| 10              | DCM          | 3              | Cu(OTf) <sub>2</sub> (5)   | 11       | >99 (96) <sup>d</sup>      |
| 11              | DCM          | 3              | CuOTf (5)                  | 11       | NR (>99) <sup>c</sup>      |
| 12              | DCM          | 3              | Cu(OAc) <sub>2</sub> (5)   | 11       | NR (98) <sup>c</sup>       |
| 13              | DCM          | 3              | CuF <sub>2</sub> (5)       | 11       | NR (>99) <sup>c</sup>      |
| 14              | DCM          | 3              | Fe(OTf) <sub>2</sub> (5)   | 11       | NR (>99) <sup>c</sup>      |
| 15              | DCM          | 3              | Zn(OTf) <sub>2</sub> (5)   | 11       | NR (96) <sup>c</sup>       |
| 16              | DCM          | 3              | ZnBr <sub>2</sub> (5)      | 11       | NR (>99) <sup>c</sup>      |
| 17              | DCM          | 3              | Cu(OTf) <sub>2</sub> (0)   | 6        | NR (99) <sup>c</sup>       |
| 18              | DCM          | 0              | Cu(OTf) <sub>2</sub> (5)   | 6        | NR (>99) <sup>c</sup>      |
| 19 <sup>e</sup> | DCM          | 3              | Cu(OTf) <sub>2</sub> (5)   | 24       | NR (96) <sup>c</sup>       |
| 20 <sup>f</sup> | DCM          | 0              | Cu(OTf) <sub>2</sub> (3)   | 0.5      | 97 (96) <sup>d</sup>       |
| 21 <sup>f</sup> | DCM          | 0              | Cu(OTf) <sub>2</sub> (0)   | 0.5      | NR (>99) <sup>c</sup>      |

|                 |     |   |                          |   |                       |
|-----------------|-----|---|--------------------------|---|-----------------------|
| 22 <sup>g</sup> | DCM | 3 | Cu(OTf) <sub>2</sub> (5) | 4 | >99                   |
| 23 <sup>g</sup> | DCM | 0 | Cu(OTf) <sub>2</sub> (5) | 4 | NR (>99) <sup>c</sup> |

<sup>a</sup> All reactions were carried out using **1a** (0.2 mmol), Cu(OTf)<sub>2</sub>, and Eosin Y in anhydrous solvent (5 mL) in a thin glass tube irradiated by a 23 W household lamp at rt under argon atmosphere. <sup>b</sup> Yield determined by <sup>1</sup>H NMR (400 MHz) analysis employing CH<sub>2</sub>Br<sub>2</sub> (0.2 mmol) as internal standard. <sup>c</sup> Recovered yield of **1a**. <sup>d</sup> Isolated yield of **6a**. <sup>e</sup> Reaction was performed without light. <sup>f</sup> The reaction was irradiated by 254 nm UV light. <sup>g</sup> The reaction was irradiated by Green LED lamp.

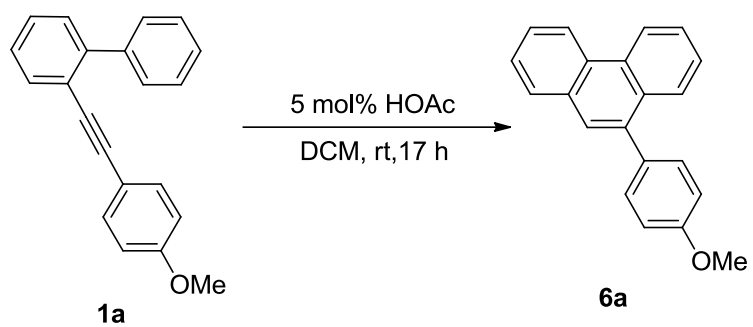

NR, 99% of **1a** was recovered

**Scheme S1. Cyclization of 1a in the presence of HOAc.**

## Experimental Section

### General information

$^1\text{H}$  (400 MHz),  $^{13}\text{C}$  (100 MHz), and  $^{19}\text{F}$  (376 MHz) NMR spectra of samples in  $\text{CDCl}_3$  were recorded on an AVANCE III 400 spectrometer. IR spectra were recorded on an Avatar 360 FT-IR spectrometer. HRMS (EI, 70 eV) determinations were carried out on a Water GCT CA176 spectrometer. HRMS (ESI) determinations were carried out on a Bruker Daltonics APEXIII<sup>TM</sup> ESI-FTICRMS spectrometer. Melting points were determined on a WRS-2 apparatus. X-ray crystal was carried out on a Bruker SMART CCD. Anhydrous DCM and MeCN were distilled with  $\text{CaH}_2$ . **1a**,<sup>1</sup>**1b**,<sup>1</sup>**1d**,<sup>1</sup>**1e**,<sup>1</sup>**1f**,<sup>1</sup>**1g**,<sup>1</sup>**1i**,<sup>1</sup>**1j**,<sup>1</sup>**1k**,<sup>1</sup>**1l**,<sup>1</sup>**1m**,<sup>1</sup>**1n**,<sup>1</sup>**1o**,<sup>2</sup>**1r**,<sup>1</sup>**1s**,<sup>2</sup>**1t**,<sup>1</sup>**1u**,<sup>2</sup>**1v**,<sup>2</sup>**1w**,<sup>2</sup>**1x**,<sup>1</sup> and **1y**<sup>1</sup> were synthesized according to literature procedures.

### Typical Procedure I for the synthesis of arene-alkynes.

#### Synthesis of 2-((4-acetoxyphenyl)ethynyl)-1,1'-biphenyl (**1c**)

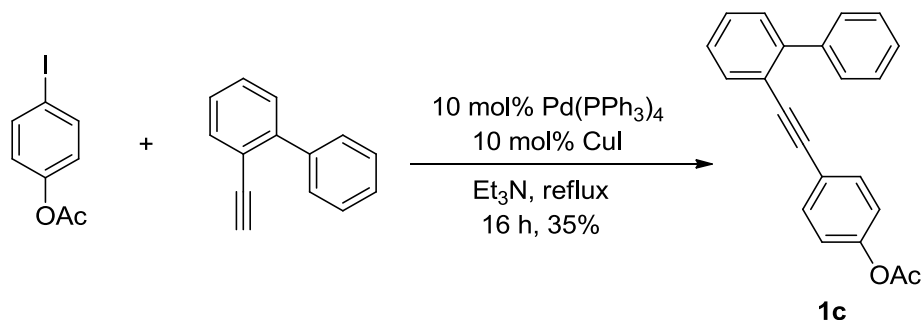

1-Acetoxy-4-iodobenzene (2.613 g, 10.0 mmol), 2-ethynyl-1,1'-biphenyl (1.881 g, 10.6 mmol),  $\text{Pd}(\text{PPh}_3)_4$  (1.215 g, 0.98 mmol),  $\text{CuI}$  (191 mg, 1.00 mmol), and  $\text{Et}_3\text{N}$  (125 mL) were added subsequently into a 250 mL of dry three-necked flask. The resulting mixture was refluxed. The reaction was completed after 16 hours as monitored by TLC (eluent: petroleum ether). Then it was cooled to room temperature. The solvent was removed and the residue was purified by flash chromatography on silica gel (eluent: petroleum ether) to afford **1c** as a liquid (1.082 g, 35%).  $^1\text{H}$  NMR (400 MHz,  $\text{CDCl}_3$ )  $\delta$  7.67-7.59 (m, 3 H), 7.47-7.28 (m, 8 H), 7.03-6.97 (m, 2 H), 2.26 (s, 3 H);  $^{13}\text{C}$  NMR (100 MHz,  $\text{CDCl}_3$ )  $\delta$  169.0, 150.3, 143.9, 140.5, 132.7, 132.4, 129.4, 129.3, 128.5, 127.8, 127.4, 127.0, 121.6, 121.4, 121.1, 91.4, 89.4, 21.0; IR (neat) 1772, 1760, 1738, 1692, 1604, 1482, 1452, 1430, 1366  $\text{cm}^{-1}$ ; HRMS (EI, 70

eV) calcd for C<sub>22</sub>H<sub>16</sub>O<sub>2</sub> 312.1150, found 312.1146.

The following compound was prepared according to Typical Procedure I.

1) 4-Methyl-2-(phenylethynyl)-1,1'-biphenyl (**1h**)

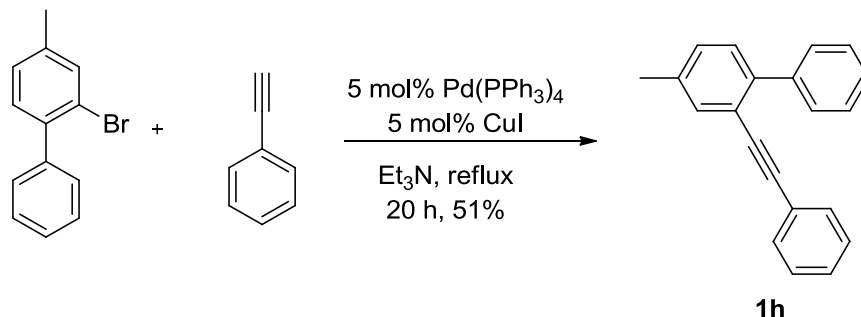

The reaction of 2-bromo-4-methyl-1,1'-biphenyl (5.603 g, 22.9 mmol), phenylacetylene (3 mL, 27.3 mmol), Pd(PPh<sub>3</sub>)<sub>4</sub> (1.319 g, 1.14 mmol), CuI (217 mg, 1.14 mmol), and Et<sub>3</sub>N (150 mL) afforded **1h** as a liquid (3.126 g, 51%). <sup>1</sup>H NMR (400 MHz, CDCl<sub>3</sub>) δ 7.64 (d, *J* = 8.4 Hz, 2 H), 7.51-7.20 (m, 10 H), 7.19-7.11 (m, 1 H), 2.35 (s, 3 H); <sup>13</sup>C NMR (100 MHz, CDCl<sub>3</sub>) δ 141.1, 140.5, 136.7, 133.3, 131.3, 129.5, 129.3, 128.2, 128.0, 127.8, 127.2, 123.5, 121.2, 91.8, 89.6, 20.8; IR (neat) 1598, 1509, 1489, 1478, 1439 cm<sup>-1</sup>; HRMS (EI, 70 eV) calcd for C<sub>21</sub>H<sub>16</sub> 268.1252, found 268.1250.

Typical Procedure II for the synthesis of arene-alkynes.

Synthesis of 2',5-dimethyl-2-(phenylethynyl)-1,1'-biphenyl (**1p**)

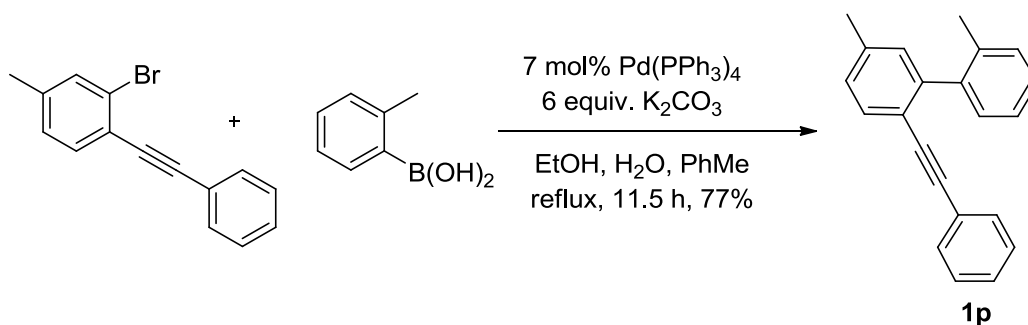

2-Bromo-4-methyl-1-(phenylethynyl)benzene (2.716 g, 10.1 mmol), *o*-tolylboronic acid (1.401 g, 10.3 mmol), Pd(PPh<sub>3</sub>)<sub>4</sub> (882 mg, 0.74 mmol), K<sub>2</sub>CO<sub>3</sub> (8.311 g, 60.1 mmol), EtOH (50 mL), H<sub>2</sub>O (50 mL), and PhMe (200 mL) were added subsequently into a 500 mL of dry three-necked flask. The resulting mixture was refluxed. The reaction was completed after 11.5 hours as monitored by TLC (eluent: petroleum

ether). Then it was cooled to room temperature. The solvent was removed and the residue was purified by flash chromatography on silica gel (eluent: petroleum ether) to afford **1p** as a liquid (2.176 g, 77%). <sup>1</sup>H NMR (400 MHz, CDCl<sub>3</sub>) δ 7.49 (d, *J* = 7.6, 1 H), 7.32-7.15 (m, 7 H), 7.14-7.01 (m, 4 H), 2.38 (s, 3 H), 2.21 (s, 3 H); <sup>13</sup>C NMR (100 MHz, CDCl<sub>3</sub>) δ 144.6, 140.9, 138.2, 136.3, 131.5, 131.2, 130.2, 129.8, 129.6, 128.1, 127.78, 127.75, 127.4, 125.2, 123.5, 119.9, 91.5, 89.1, 21.5, 20.0; IR (neat) 1595, 1571, 1500, 1488, 1439 cm<sup>-1</sup>; HRMS (EI, 70 eV) calcd for C<sub>22</sub>H<sub>18</sub> 282.1409, found 282.1407.

The following compounds were prepared according to Typical Procedure II.

1) 4',5-Dimethyl-2-(phenylethynyl)-1,1'-biphenyl (**1q**)

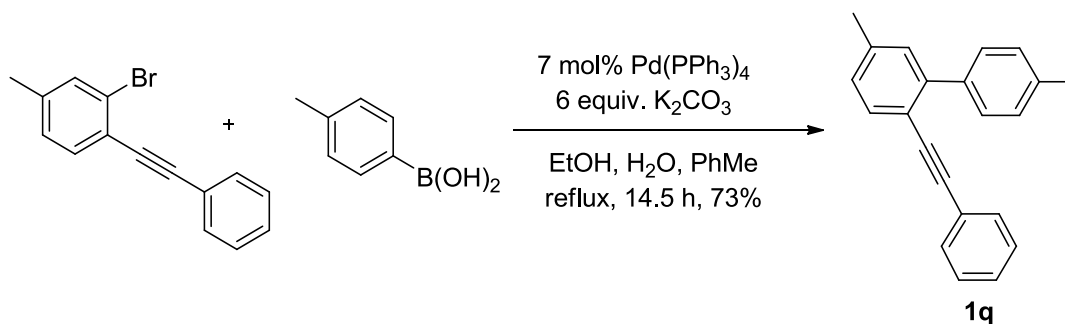

The reaction of 2-bromo-4-methyl-1-(phenylethynyl)benzene (2.713 g, 10.0 mmol), *p*-tolylboronic acid (1.370 g, 10.1 mmol), Pd(PPh<sub>3</sub>)<sub>4</sub> (892 mg, 0.77 mmol), K<sub>2</sub>CO<sub>3</sub> (8.312 g, 60.1 mmol), EtOH (50 mL), H<sub>2</sub>O (50 mL), and PhMe (200 mL) afforded **1q**<sup>3</sup> as a liquid (2.048 g, 73%). <sup>1</sup>H NMR (400 MHz, CDCl<sub>3</sub>) δ 7.59-7.46 (m, 3 H), 7.39-7.19 (m, 8 H), 7.12 (d, *J* = 8.0, 1 H), 2.42 (s, 3 H), 2.40 (s, 3 H).

2) 5-Methyl-4'-trifluoromethyl-2-((4-methylphenyl)ethynyl)-1,1'-biphenyl (**1aa**)

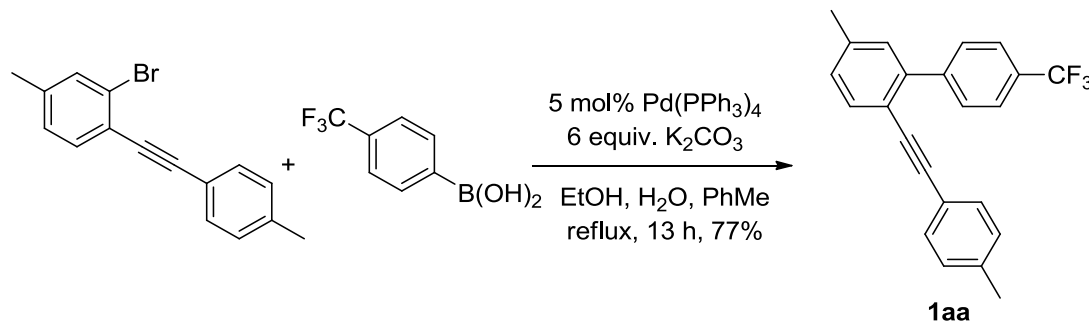

The reaction of 2-bromo-4-methyl-1-(*p*-tolylethynyl)benzene (4.270 g, 15.0 mmol), (4-(trifluoromethyl)phenyl)boronic acid (2.900 g, 15.3 mmol), Pd(PPh<sub>3</sub>)<sub>4</sub> (877 mg, 0.76 mmol), K<sub>2</sub>CO<sub>3</sub> (12.536 g, 90.7 mmol), EtOH (20 mL), H<sub>2</sub>O (20 mL), and PhMe

(75 mL) afforded **1aa** as a solid (4.046 g, 77%); mp 111.9-112.7 °C (ethyl acetate/petroleum ether). <sup>1</sup>H NMR (400 MHz, CDCl<sub>3</sub>) δ 7.75 (d, *J* = 8.0 Hz, 2 H), 7.68 (d, *J* = 8.4 Hz, 2 H), 7.54 (d, *J* = 8.0 Hz, 1 H), 7.24-7.14 (m, 4 H), 7.09 (d, *J* = 8.0 Hz, 2 H), 2.41 (s, 3 H), 2.32 (s, 3 H); <sup>13</sup>C NMR (100 MHz, CDCl<sub>3</sub>) δ 144.3, 142.1, 138.6, 138.3, 132.8, 131.1, 130.1, 129.7, 129.1, 128.6, 124.8, 124.7, 120.2, 118.9, 92.3, 88.2, 21.4; <sup>19</sup>F NMR (376 MHz, CDCl<sub>3</sub>) δ -62.3; IR (neat) 1613, 1558, 1513, 1482 cm<sup>-1</sup>; HRMS (EI, 70 eV) calcd for C<sub>23</sub>H<sub>17</sub>F<sub>3</sub> 350.1282, found: 350.1275.

### Synthesis of 5-methyl-4'-acetyl-2-((4-methylphenyl)ethynyl)-1,1'-biphenyl (**1z**)

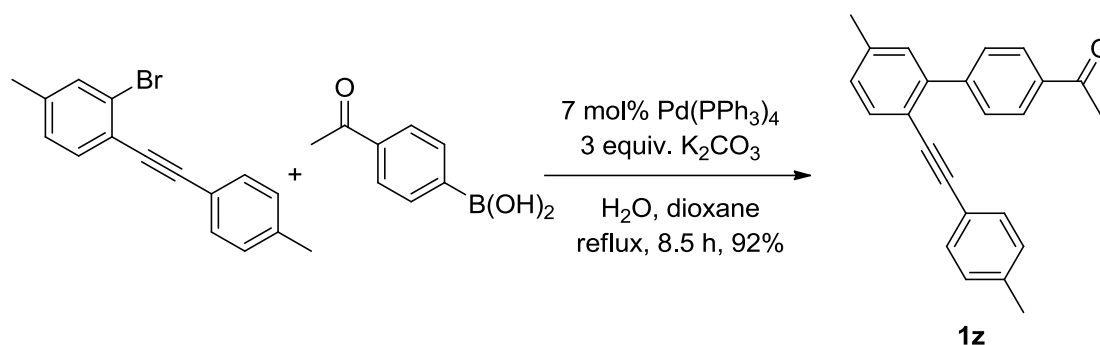

2-Bromo-4-methyl-1-(*p*-tolylethynyl)benzene (853 mg, 3.0 mmol), (4-acetylphenyl)boronic acid (492 mg, 3 mmol), Pd(PPh<sub>3</sub>)<sub>4</sub> (243 mg, 0.21 mmol), K<sub>2</sub>CO<sub>3</sub> (954 mg, 9 mmol), H<sub>2</sub>O (15 mL), and dioxane (50 mL) were added subsequently into a 100 mL of dry three-necked flask. The resulting mixture was refluxed. The reaction was completed after 8.5 hours as monitored by TLC (eluent: petroleum ether:ethyl acetate = 30:1). Then it was cooled to room temperature, and extracted with ethyl acetate (20 mL x 3). The combined organic layer was dried over MgSO<sub>4</sub>. After filtration and concentration, the residue was purified by flash column chromatography on silica gel (eluent: petroleum ether:ethyl acetate = 50:1) to afford **1z** as a solid (894 mg, 92%); mp 99.6-100.2 °C (ethyl acetate/petroleum ether). <sup>1</sup>H NMR (400 MHz, CDCl<sub>3</sub>) δ 8.04 (d, *J* = 8.4 Hz, 2 H), 7.77 (d, *J* = 8.4 Hz, 2 H), 7.55 (d, *J* = 7.6 Hz, 1 H), 7.25-7.15 (m, 4 H), 7.09 (d, *J* = 8.0 Hz, 2 H), 2.66 (s, 3 H), 2.43 (s, 3 H), 2.34 (s, 3 H); <sup>13</sup>C NMR (100 MHz, CDCl<sub>3</sub>) δ 198.0, 145.6, 142.2, 138.6, 138.3, 135.8, 132.9, 131.1, 130.1, 129.5, 129.0, 128.6, 127.9, 120.2, 118.8, 92.2, 88.2, 26.7, 21.4; IR (neat) 1683, 1604, 1558, 1513, 1482, 1446, 1412 cm<sup>-1</sup>; HRMS (ESI)



calcd for C<sub>24</sub>H<sub>21</sub>O (M + H<sup>+</sup>) 325.1587, found 325.1599.

### Typical Procedure III for the photoreaction.

#### Synthesis of 9-(4-methoxyphenyl)phenanthrene (6a)

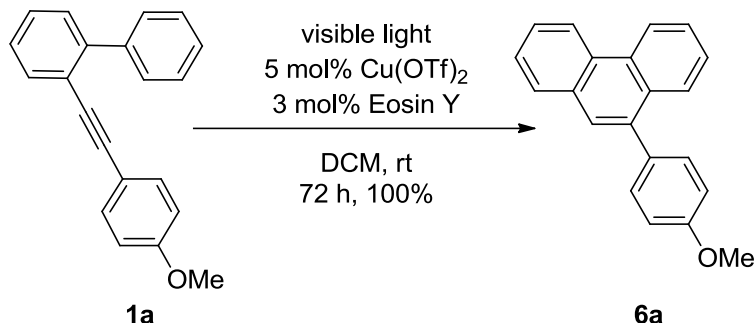

**1a** (57 mg, 0.20 mmol), Cu(OTf)<sub>2</sub> (4 mg, 0.01 mmol), Eosin Y (4 mg, 0.006 mmol), and anhydrous DCM (5 mL) were added subsequently into a 25 mL of dry pyrex sealed tube. The reaction mixture was degassed with three freeze-pump-thaw cycles. Then, the reaction mixture was irradiated by a 23 W household lamp at rt under argon atmosphere. The photoreaction was completed after 72 h as monitored by TLC (eluent: petroleum ether). The solvent was removed and the residue was purified by flash chromatography on silica gel (eluent: petroleum ether) to afford **6a**<sup>2</sup> as a liquid (58 mg, 100%). <sup>1</sup>H NMR (400 MHz, CDCl<sub>3</sub>) δ 8.82 (d, *J* = 8.4, 1 H), 8.77 (d, *J* = 8.4, 1 H), 8.04 (d, *J* = 8.4, 1 H), 7.94 (d, *J* = 8.0, 1 H), 7.78-7.48 (m, 7 H), 7.11 (d, *J* = 8.8, 2 H), 3.94 (s, 3 H).

Crystal data for **6a**: C<sub>21</sub>H<sub>16</sub>O, MW = 284.34, Monoclinic, space group P 21/c, a51119b, final R indices [I>2σ(I)], R1 = 0.0476, wR2 = 0.0826, a = 13.33(5) Å, b = 15.13(5) Å, c = 7.59(3) Å, α = 90°, β = 100.77(5)°, γ = 90°, V = 1503(9) Å<sup>3</sup>, T = 296(2) K, Z = 4, reflections collected / unique: 5793, [R(int) = 0.0977], parameters 200. Supplementary crystallographic data have been deposited at the Cambridge Crystallographic Data Center. CCDC: 1442356.

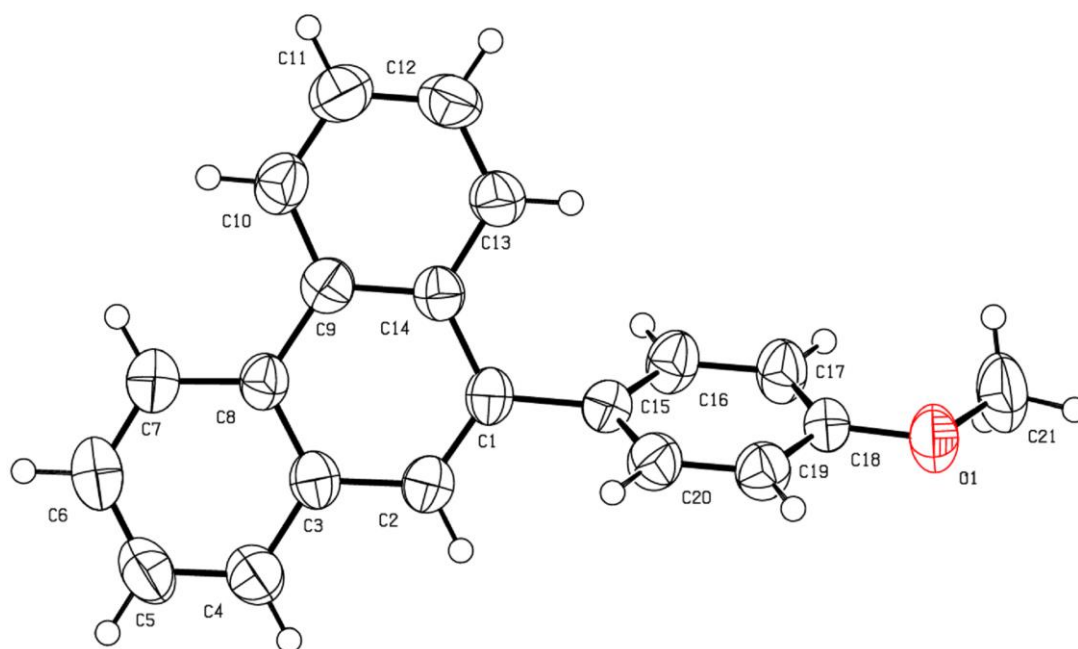

The following compounds were prepared according to Typical Procedure III.

1) 9-(4-Ethoxyphenyl)phenanthrene (**6b**)

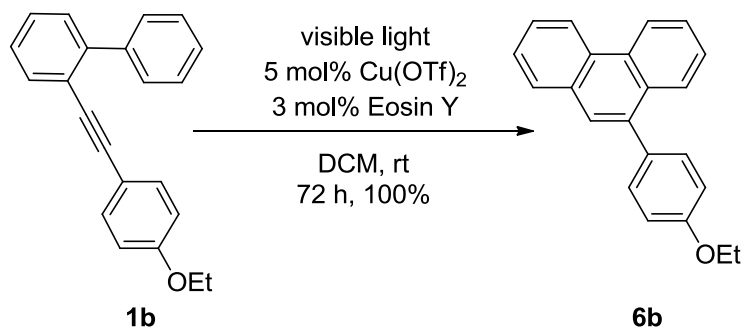

The reaction of **1b** (62 mg, 0.21 mmol), Cu(OTf)<sub>2</sub> (4 mg, 0.01 mmol), Eosin Y (4 mg, 0.006 mmol), and anhydrous DCM (5 mL) afforded **6b**<sup>2</sup> as a solid (63 mg, 100%). <sup>1</sup>H NMR (400 MHz, CDCl<sub>3</sub>) δ 8.77 (d, *J* = 8.4 Hz, 1 H), 8.72 (d, *J* = 8.0 Hz, 1 H), 7.95 (d, *J* = 8.4 Hz, 1 H), 7.88 (d, *J* = 8.0 Hz, 1 H), 7.73-7.40 (m, 7 H), 7.04 (d, *J* = 8.8 Hz, 1 H), 4.14 (q, *J* = 7.2 Hz, 2 H), 1.49 (t, *J* = 7.2 Hz, 3 H).

2) 9-(4-Acetoxyphenyl)-phenanthrene (**6c**)

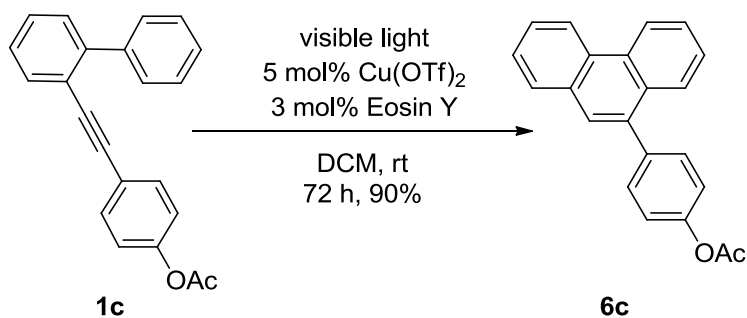

The reaction of **1c** (62 mg, 0.20 mmol), Cu(OTf)<sub>2</sub> (4 mg, 0.01 mmol), Eosin Y (4 mg, 0.006 mmol), and anhydrous DCM (5 mL) afforded **6c** as a liquid (56 mg, 90%). <sup>1</sup>H NMR (400 MHz, CDCl<sub>3</sub>) δ 8.78 (d, *J* = 8.4 Hz, 1 H), 8.73 (d, *J* = 8.4 Hz, 1 H), 7.91 (t, *J* = 8.4 Hz, 2 H), 7.71-7.49 (m, 7 H), 7.24 (d, *J* = 8.8 Hz, 2 H), 2.37 (s, 3 H); <sup>13</sup>C NMR (100 MHz, CDCl<sub>3</sub>) δ 169.5, 150.1, 138.4, 137.8, 131.5, 131.1, 130.6, 130.0, 128.7, 127.7, 126.9, 126.8, 126.7, 126.6, 126.5, 122.9, 122.5, 121.4, 21.2; IR (neat) 1766, 1601, 1528, 1503, 1488, 1452, 1427 cm<sup>-1</sup>; HRMS (ESI) calcd for C<sub>22</sub>H<sub>17</sub>O<sub>2</sub> (M + H<sup>+</sup>) 313.1223, found 313.1222.

### 3) 9-(*p*-Tolyl)phenanthrene (**6d**)

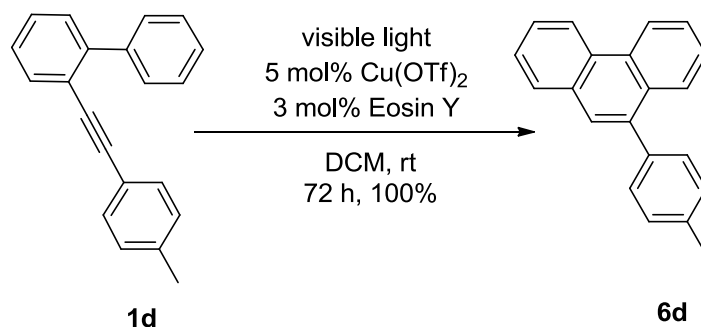

The reaction of **1d** (54 mg, 0.20 mmol), Cu(OTf)<sub>2</sub> (4 mg, 0.01 mmol), Eosin Y (4 mg, 0.006 mmol), and anhydrous DCM (5 mL) afforded **6d**<sup>2</sup> as a solid (54 mg, 100%). <sup>1</sup>H NMR (400 MHz, CDCl<sub>3</sub>) δ 8.75 (d, *J* = 8.4 Hz, 1 H), 8.70 (d, *J* = 8.4 Hz, 1 H), 7.93 (d, *J* = 8.0 Hz, 1 H), 7.86 (d, *J* = 8.4 Hz, 1 H), 7.69-7.38 (m, 7 H), 7.31 (d, *J* = 7.6 Hz, 2 H), 2.46 (s, 3 H).

### 4) 9-(4-Ethylphenyl)phenanthrene (**6e**)

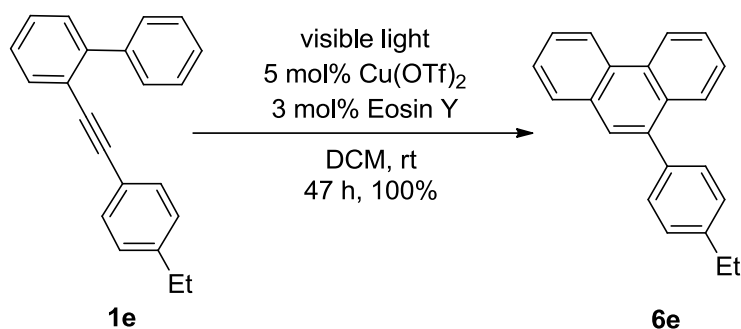

The reaction of **1e** (57 mg, 0.20 mmol), Cu(OTf)<sub>2</sub> (4 mg, 0.01 mmol), Eosin Y (4 mg, 0.006 mmol), and anhydrous DCM (5 mL) afforded **6e** as a solid (58 mg, 100%); mp 83.6-85.5 °C (ethyl acetate/petroleum ether). <sup>1</sup>H NMR (400 MHz, CDCl<sub>3</sub>) δ 8.77 (d, *J* = 8.0 Hz, 1 H), 8.72 (d, *J* = 8.0 Hz, 1 H), 7.96 (d, *J* = 8.0 Hz, 1 H), 7.89 (d, *J* = 7.2 Hz, 1 H), 7.72-7.43 (m, 7 H), 7.35 (d, *J* = 7.6 Hz, 2 H), 2.78 (q, *J* = 7.6 Hz, 2 H), 1.35 (t, *J* = 7.6 Hz, 3 H); <sup>13</sup>C NMR (100 MHz, CDCl<sub>3</sub>) δ 143.4, 138.8, 138.0, 131.6, 131.2, 130.6, 130.0, 129.9, 128.6, 127.8, 127.4, 127.0, 126.8, 126.44, 126.41, 126.36, 122.8, 122.5, 28.7, 15.6; IR (neat) 1525, 1507, 1488, 1449, 1430, 1418, 1409 cm<sup>-1</sup>; HRMS (EI, 70 eV) calcd for C<sub>22</sub>H<sub>18</sub> 282.1409, found 282.1412.

### 5) 9-Phenylphenanthrene (**6f**)

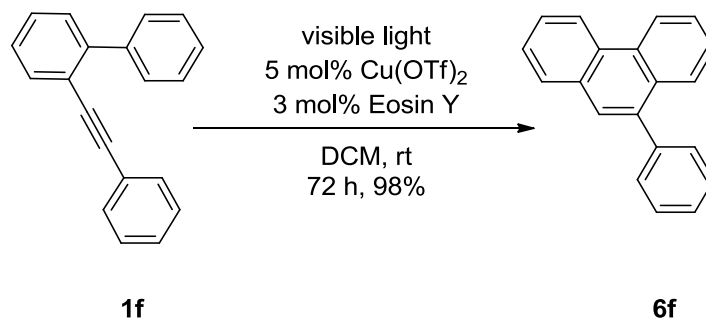

The reaction of **1f** (51 mg, 0.20 mmol), Cu(OTf)<sub>2</sub> (4 mg, 0.01 mmol), Eosin Y (4 mg, 0.006 mmol), and anhydrous DCM (5 mL) afforded **6f**<sup>2</sup> as a solid (50 mg, 98%). <sup>1</sup>H NMR (400 MHz, CDCl<sub>3</sub>) δ 8.78 (d, *J* = 8.0 Hz, 1 H), 8.73 (d, *J* = 8.0 Hz, 1 H), 7.95-7.85 (m, 2 H), 7.73-7.41 (m, 10 H).

### 6) 2-Methyl-9-phenylphenanthrene (**6h**)

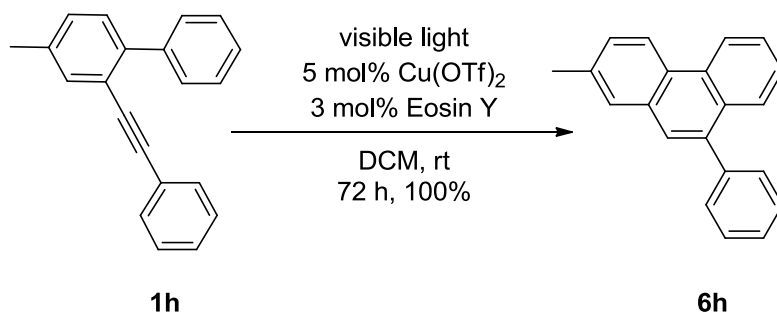

The reaction of **1h** (54 mg, 0.20 mmol), Cu(OTf)<sub>2</sub> (4 mg, 0.01 mmol), Eosin Y (4 mg, 0.006 mmol), and anhydrous DCM (5 mL) afforded **6h** as a liquid (54 mg, 100%). <sup>1</sup>H NMR (400 MHz, CDCl<sub>3</sub>) δ 8.73 (d, *J* = 8.0 Hz, 1 H), 8.61 (d, *J* = 8.8 Hz, 1 H), 7.89 (d, *J* = 8.4 Hz, 1 H), 7.70-7.59 (m, 3 H), 7.58-7.41 (m, 7 H), 2.57 (s, 3 H); <sup>13</sup>C NMR (100 MHz, CDCl<sub>3</sub>) δ 140.9, 138.7, 136.6, 131.7, 130.8, 130.6, 130.1, 128.4, 128.3, 128.2, 127.8, 127.3, 126.9, 126.4, 126.0, 122.7, 122.4, 21.5; IR (neat) 1622, 1595, 1525, 1485, 1449, 1427 cm<sup>-1</sup>; HRMS (EI, 70 eV) calcd for C<sub>21</sub>H<sub>16</sub> 268.1252, found 268.1250.

#### 7) 4-Methyl-10-phenylphenanthrene (**6k**)

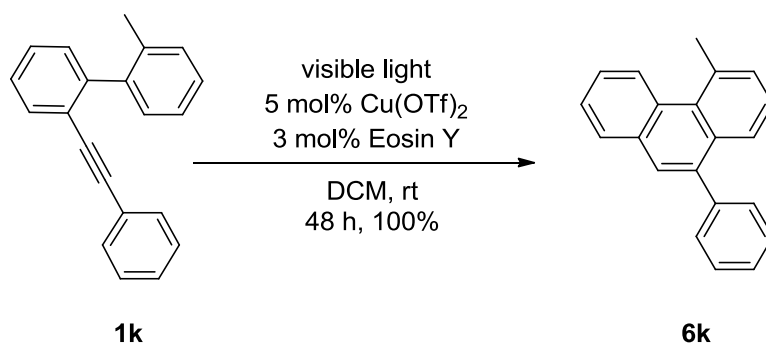

The reaction of **1k** (54 mg, 0.20 mmol), Cu(OTf)<sub>2</sub> (4 mg, 0.01 mmol), Eosin Y (4 mg, 0.006 mmol), and anhydrous DCM (5 mL) afforded **6k**<sup>2</sup> as a liquid (54 mg, 100%). <sup>1</sup>H NMR (400 MHz, CDCl<sub>3</sub>) δ 8.89 (d, *J* = 8.0 Hz, 1 H), 7.90 (d, *J* = 6.4 Hz, 1 H), 7.77 (d, *J* = 8.0 Hz, 1 H), 7.69-7.35 (m, 10 H), 3.18 (s, 3 H).

#### 8) 9-(4-Methoxyphenyl)-3-methylphenanthrene (**6m**)

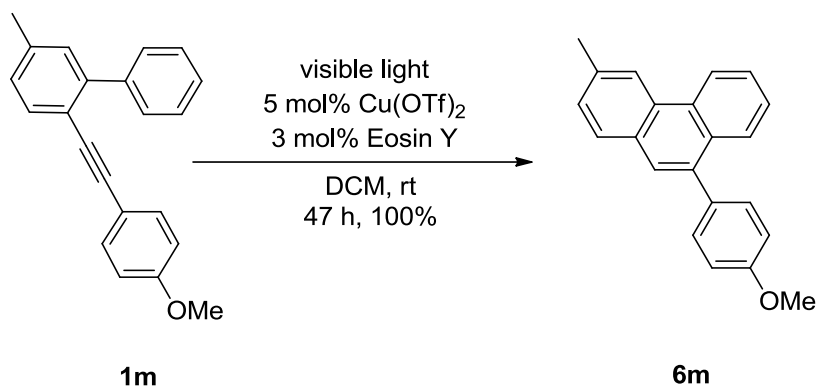

The reaction of **1m** (60 mg, 0.20 mmol), Cu(OTf)<sub>2</sub> (4 mg, 0.01 mmol), Eosin Y (4 mg, 0.006 mmol), and anhydrous DCM (5 mL) afforded **6m**<sup>4</sup> as a solid (60 mg, 100%). <sup>1</sup>H NMR (400 MHz, CDCl<sub>3</sub>) δ 8.72 (d, *J* = 8.0 Hz, 1 H), 8.47 (s, 1 H), 7.91 (d, *J* = 8.0 Hz, 1 H), 7.73 (d, *J* = 8.0 Hz, 1 H), 7.63-7.51 (m, 2 H), 7.50-7.34 (m, 4 H), 7.01 (d, *J* = 8.4 Hz, 2 H), 3.85 (s, 3 H), 2.60 (s, 3 H).

**9) 10-(4-Methoxyphenyl)-4-methylphenanthrene (6n)**

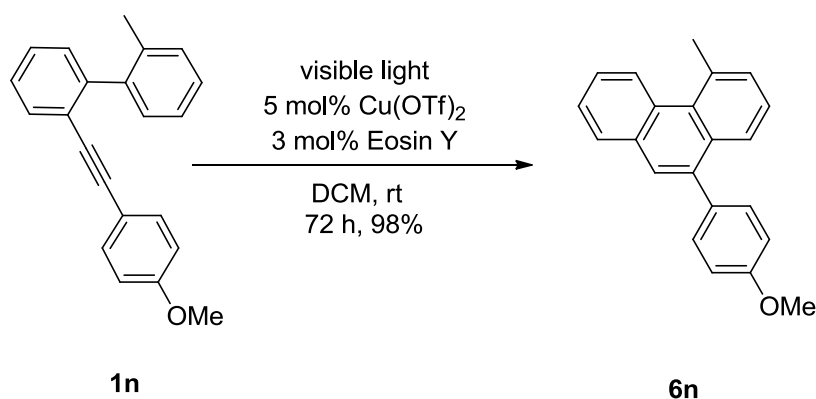

The reaction of **1n** (60 mg, 0.20 mmol), Cu(OTf)<sub>2</sub> (4 mg, 0.01 mmol), Eosin Y (4 mg, 0.006 mmol), and anhydrous DCM (5 mL) afforded **6n**<sup>2</sup> as a solid (59 mg, 98%). <sup>1</sup>H NMR (400 MHz, CDCl<sub>3</sub>) δ 8.89 (d, *J* = 8.8 Hz, 1 H), 7.90 (d, *J* = 9.6 Hz, 1 H), 7.81 (d, *J* = 8.0 Hz, 1 H), 7.69-7.55 (m, 3 H), 7.54-7.48 (m, 1 H), 7.46-7.38 (m, 3 H), 7.04 (d, *J* = 8.8 Hz, 2 H), 3.91 (s, 3 H), 3.19 (s, 3 H).

**10) 3,5-Dimethyl-9-phenylphenanthrene (6p)**

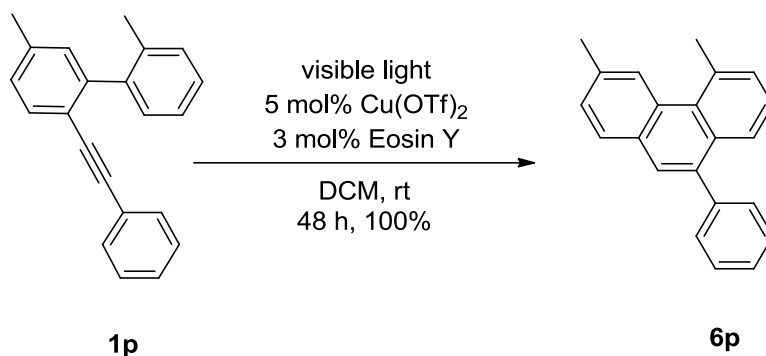

The reaction of **1p** (57 mg, 0.20 mmol), Cu(OTf)<sub>2</sub> (4 mg, 0.01 mmol), Eosin Y (4 mg, 0.006 mmol), and anhydrous DCM (5 mL) afforded **6p** as a liquid (57 mg, 100%). <sup>1</sup>H NMR (400 MHz, CDCl<sub>3</sub>) δ 8.68 (s, 1 H), 7.79 (d, *J* = 8.4 Hz, 1 H), 7.75 (d, *J* = 8.0 Hz, 1 H), 7.60 (s, 1 H), 7.55-7.35 (m, 8 H), 3.18 (s, 3 H), 2.63 (s, 3 H); <sup>13</sup>C NMR (100 MHz, CDCl<sub>3</sub>) δ 141.6, 138.3, 135.6, 135.0, 133.0, 131.2, 130.9, 130.8, 130.4, 130.1, 128.5, 128.2, 127.73, 127.68, 127.5, 127.1, 125.50, 125.48, 27.6, 22.5; IR (neat) 1610, 1598, 1577, 1519, 1503, 1488, 1439 cm<sup>-1</sup>; HRMS (EI, 70 eV) calcd for C<sub>22</sub>H<sub>18</sub> 282.1409, found 282.1403.

#### 11) 2,6-Dimethyl-10-phenylphenanthrene (**6q**)

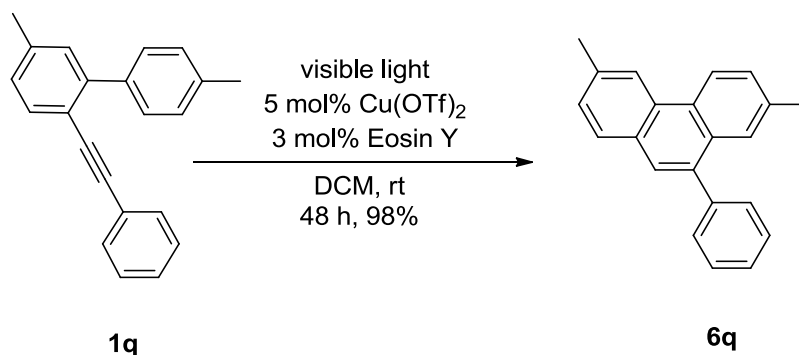

The reaction of **1q** (57 mg, 0.20 mmol), Cu(OTf)<sub>2</sub> (4 mg, 0.01 mmol), Eosin Y (4 mg, 0.006 mmol), and anhydrous DCM (5 mL) afforded **6q**<sup>5</sup> as a liquid (56 mg, 98%). <sup>1</sup>H NMR (400 MHz, CDCl<sub>3</sub>) δ 8.64 (d, *J* = 8.4 Hz, 1 H), 8.46 (s, 1 H), 7.75 (d, *J* = 8.0 Hz, 1 H), 7.66 (s, 1 H), 7.60 (s, 1 H), 7.59-7.34 (m, 7 H), 2.62 (s, 3 H), 2.46 (s, 3 H).

#### 12) 10-(4-Ethylphenyl)-2,6-dimethylphenanthrene (**6r**)

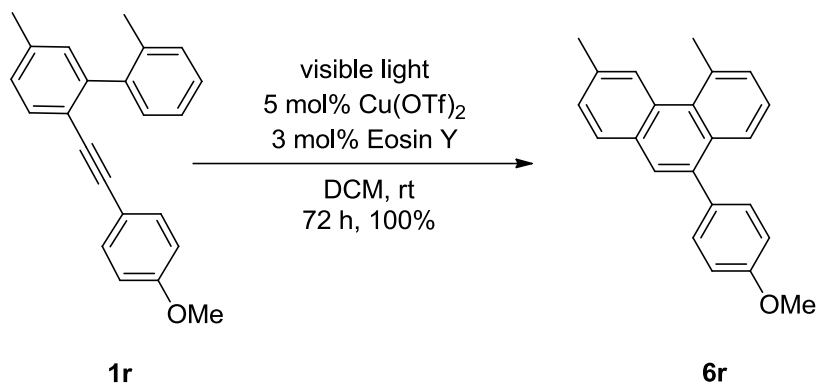

The reaction of **1r** (65 mg, 0.21 mmol), Cu(OTf)<sub>2</sub> (4 mg, 0.01 mmol), Eosin Y (4 mg, 0.006 mmol), and anhydrous DCM (5 mL) afforded **6r**<sup>2</sup> as a solid (65 mg, 100%). <sup>1</sup>H NMR (400 MHz, CDCl<sub>3</sub>) δ 8.68 (s, 1 H), 7.79 (d, *J* = 8.4 Hz, 2 H), 7.59 (s, 1 H), 7.52-7.36 (m, 5 H), 7.03 (d, *J* = 8.4 Hz, 2 H), 3.90 (s, 3 H), 3.18 (s, 3 H), 2.63 (s, 3 H).

### 13) 10-(4-Methoxyphenyl)-2,6-dimethylphenanthrene (**6s**)

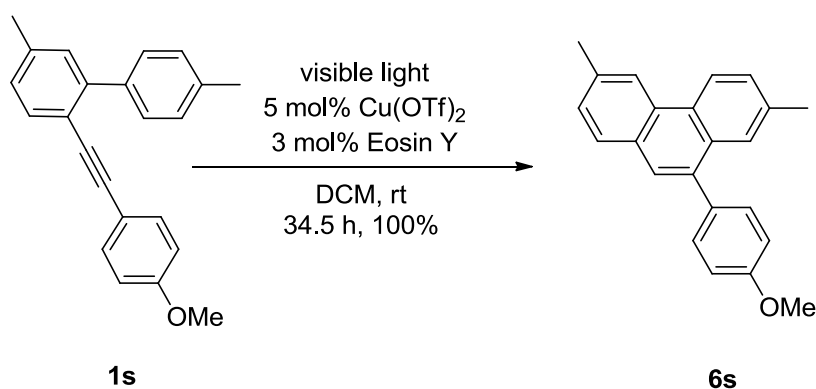

The reaction of **1s** (63 mg, 0.20 mmol), Cu(OTf)<sub>2</sub> (4 mg, 0.01 mmol), Eosin Y (4 mg, 0.006 mmol), and anhydrous DCM (5 mL) afforded **6s**<sup>2</sup> as a solid (63 mg, 100%). <sup>1</sup>H NMR (400 MHz, CDCl<sub>3</sub>) δ 8.63 (d, *J* = 8.8 Hz, 1 H), 8.45 (s, 1 H), 7.74 (d, *J* = 8.0 Hz, 1 H), 7.68 (s, 1 H), 7.58 (s, 1 H), 7.53-7.34 (m, 4 H), 7.04 (d, *J* = 8.8 Hz, 2 H), 3.90 (s, 3 H), 2.62 (s, 3 H), 2.46 (s, 3 H).

### 14) 3,5-Dimethyl-9-(*p*-tolyl)phenanthrene (**6x**)



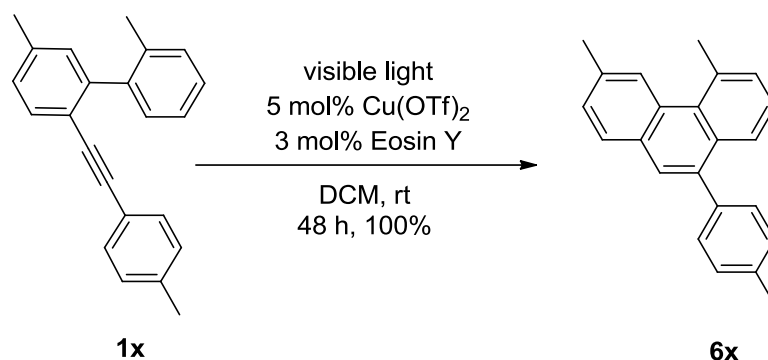

The reaction of **1x** (59 mg, 0.20 mmol), Cu(OTf)<sub>2</sub> (4 mg, 0.01 mmol), Eosin Y (4 mg, 0.006 mmol), and anhydrous DCM (5 mL) afforded **6x** as a liquid (59 mg, 100%). <sup>1</sup>H NMR (400 MHz, CDCl<sub>3</sub>) δ 8.68 (s, 1 H), 7.79 (d, *J* = 8.0 Hz, 2 H), 7.59 (s, 1 H), 7.48 (d, *J* = 6.8 Hz, 1 H), 7.45-7.32 (m, 4 H), 7.30 (d, *J* = 7.6 Hz, 2 H), 3.18 (s, 3 H), 2.63 (s, 3 H), 2.46 (s, 3 H); <sup>13</sup>C NMR (100 MHz, CDCl<sub>3</sub>) δ 138.7, 138.3, 136.8, 135.5, 134.9, 133.2, 131.2, 130.8, 130.4, 130.0, 129.2, 128.9, 128.5, 127.7, 127.5, 125.6, 125.4, 27.6, 22.5, 21.3; IR (neat) 1614, 1594, 1509, 1497, 1462, 1441 cm<sup>-1</sup>; HRMS (EI, 70 eV) calcd for C<sub>23</sub>H<sub>20</sub> 296.1565, found 296.1560.

#### 15) 2,6-Dimethyl-10-(*p*-tolyl)phenanthrene (**6y**)

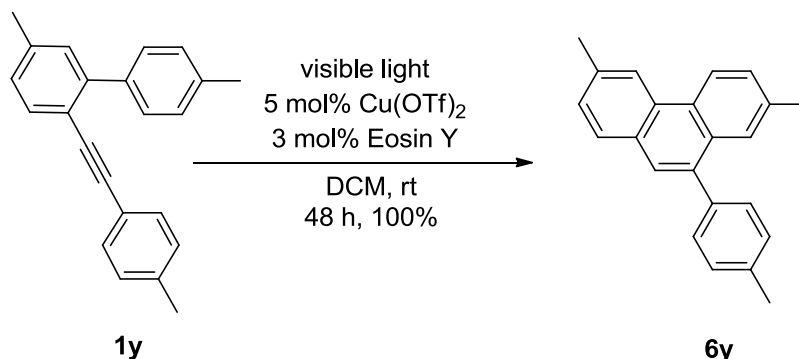

The reaction of **1y** (59 mg, 0.20 mmol), Cu(OTf)<sub>2</sub> (4 mg, 0.01 mmol), Eosin Y (4 mg, 0.006 mmol), and anhydrous DCM (5 mL) afforded **6y** as a liquid (59 mg, 100%). <sup>1</sup>H NMR (400 MHz, CDCl<sub>3</sub>) δ 8.64 (d, *J* = 8.4 Hz, 1 H), 8.45 (s, 1 H), 7.75 (d, *J* = 8.0 Hz, 1 H), 7.69 (s, 1 H), 7.59 (s, 1 H), 7.50-7.35 (m, 4 H), 7.32 (d, *J* = 7.6 Hz, 1 H), 2.62 (s, 3 H), 2.48 (s, 3 H), 2.46 (s, 3 H); <sup>13</sup>C NMR (100 MHz, CDCl<sub>3</sub>) δ 138.2, 137.5, 136.8, 136.1, 136.0, 131.4, 130.0, 129.9, 129.2, 129.0, 128.4, 128.1, 127.9, 127.4, 126.4, 122.8, 122.0, 22.2, 21.7, 21.3; IR (neat) 1619, 1598, 1558, 1522, 1507, 1494, 1439 cm<sup>-1</sup>; HRMS (EI, 70 eV) calcd for C<sub>23</sub>H<sub>20</sub> 296.1565, found 296.1568.

#### Typical Procedure IV for the photoreaction.

### Synthesis of 9-(4-chlorophenyl)phenanthrene (**6g**)

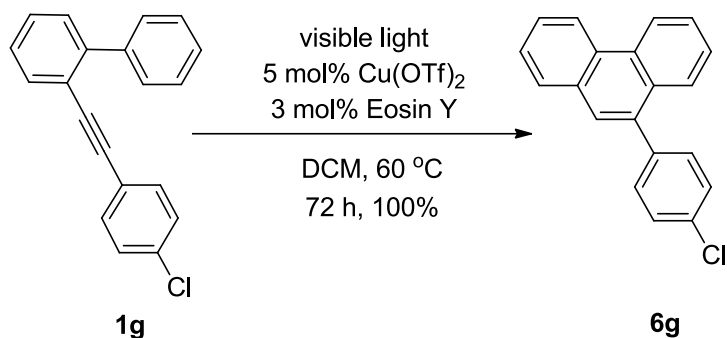

**1g** (58 mg, 0.20 mmol), Cu(OTf)<sub>2</sub> (4 mg, 0.01 mmol), Eosin Y (4 mg, 0.006 mmol), and anhydrous DCM (5 mL) were added subsequently into a 25 mL of dry pyrex sealed tube. The reaction mixture was degassed with three freeze-pump-thaw cycles. Then, the reaction mixture was irradiated by a 23 W household lamp at 60 °C under argon atmosphere. The photoreaction was completed after 72 h as monitored by TLC (eluent: petroleum ether). The solvent was removed and the residue was purified by flash chromatography on silica gel (eluent: petroleum ether) to afford **6g**<sup>5</sup> as a solid (59 mg, 100%). <sup>1</sup>H NMR (400 MHz, CDCl<sub>3</sub>) δ 8.78 (d, *J* = 8.0 Hz, 1 H), 8.72 (d, *J* = 8.0 Hz, 1 H), 7.89 (d, *J* = 8.0 Hz, 1 H), 7.85 (d, *J* = 8.4 Hz, 1 H), 7.75-7.58 (m, 4 H), 7.56-7.43 (m, 5 H).

The following compound was prepared according to Typical Procedure IV.

#### 1) 2-Chloro-9-phenylphenanthrene (**6i**)

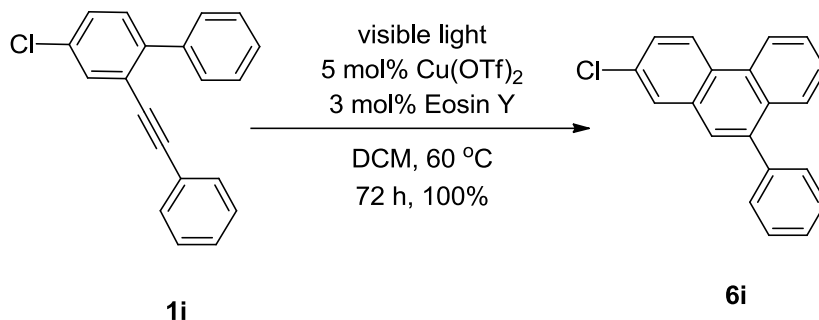

The reaction of **1i** (58 mg, 0.20 mmol), Cu(OTf)<sub>2</sub> (4 mg, 0.01 mmol), Eosin Y (4 mg, 0.006 mmol), and anhydrous DCM (5 mL) afforded **6i** as a liquid (58 mg, 100%). <sup>1</sup>H NMR (400 MHz, CDCl<sub>3</sub>) δ 8.69 (d, *J* = 8.4 Hz, 1 H), 8.62 (d, *J* = 8.8 Hz, 1 H), 7.90 (d, *J* = 8.4 Hz, 1 H), 7.85 (s, 1 H), 7.67 (t, *J* = 8.0 Hz, 1 H), 7.63-7.42 (m, 8 H); <sup>13</sup>C NMR (100 MHz, CDCl<sub>3</sub>) δ 140.3, 140.1, 132.6, 131.0, 130.2, 129.9, 128.4, 128.3, 127.6,

127.5, 127.1, 127.0, 126.9, 126.8, 126.4, 124.2, 122.8; IR (neat) 1607, 1567, 1519, 1482, 1449, 1430, 1406  $\text{cm}^{-1}$ ; HRMS (EI, 70 eV) calcd for  $\text{C}_{21}\text{H}_{13}\text{Cl}$  288.0706, found 288.0701.

## 2) 2-Bromo-10-(4-methoxyphenyl)-6-methylphenanthrene (6t)

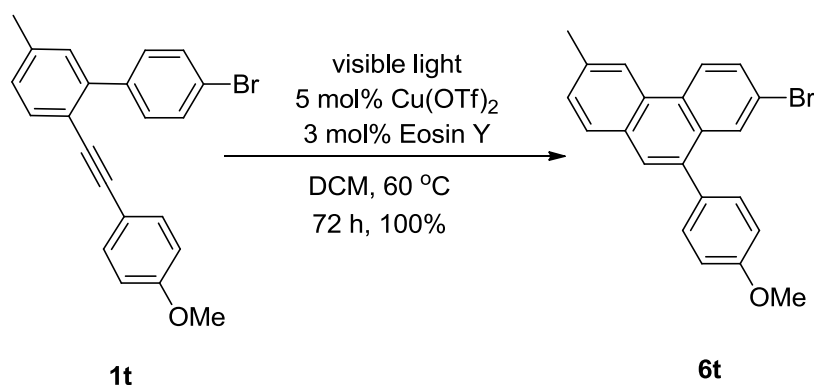

The reaction of **1t** (78 mg, 0.21 mmol),  $\text{Cu}(\text{OTf})_2$  (4 mg, 0.01 mmol), Eosin Y (4 mg, 0.006 mmol), and anhydrous DCM (5 mL) afforded **6t**<sup>2</sup> as a solid (78 mg, 100%). <sup>1</sup>H NMR (400 MHz,  $\text{CDCl}_3$ )  $\delta$  8.59 (d,  $J = 9.2$  Hz, 1 H), 8.42 (s, 1 H), 8.04 (s, 1 H), 7.76 (d,  $J = 8.4$  Hz, 1 H), 7.70 (d,  $J = 6.8$  Hz, 1 H), 7.63 (s, 1 H), 7.50-7.38 (m, 3 H), 7.05 (d,  $J = 8.8$  Hz, 2 H), 3.91 (s, 3 H), 2.63 (s, 3 H).

### Typical Procedure V for the photoreaction.

#### Synthesis of 2-methoxycarbonyl-9-phenyl-phenanthrene (6j)

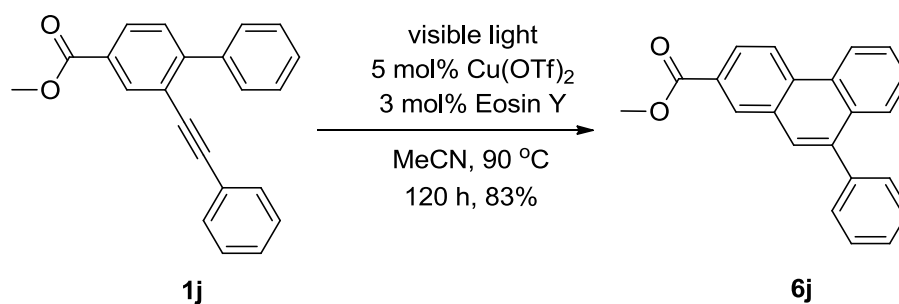

**1j** (63 mg, 0.20 mmol),  $\text{Cu}(\text{OTf})_2$  (4 mg, 0.01 mmol), Eosin Y (4 mg, 0.006 mmol), and anhydrous MeCN (5 mL) were added subsequently into a 25 mL of dry pyrex sealed tube. The reaction mixture was degassed with three freeze-pump-thaw cycles. Then, the reaction mixture was irradiated by a 23 W household lamp at 90 °C under argon atmosphere. The photoreaction was completed after 72 h as monitored by TLC (eluent: petroleum ether:ethyl acetate = 50:1). The solvent was removed and the residue was purified by flash chromatography on silica gel (eluent: petroleum

ether:ethyl acetate = 50:1) to afford **6j** as a liquid (52 mg, 83%).  $^1\text{H}$  NMR (400 MHz,  $\text{CDCl}_3$ )  $\delta$  8.76 (d,  $J = 8.4$  Hz, 1 H), 8.72 (d,  $J = 8.8$  Hz, 1 H), 8.59 (s, 1 H), 8.24 (d,  $J = 8.8$  Hz, 1 H), 7.92 (d,  $J = 8.0$  Hz, 1 H), 7.76-7.63 (m, 2 H), 7.62-7.41 (m, 6 H), 3.99 (s, 3 H);  $^{13}\text{C}$  NMR (100 MHz,  $\text{CDCl}_3$ )  $\delta$  167.1, 140.3, 139.6, 132.9, 132.0, 130.9, 130.0, 129.9, 128.4, 128.1, 127.62, 127.55, 127.1, 126.8, 126.4, 123.5, 122.8, 52.2; IR (neat) 1723, 1619, 1592, 1571, 1522, 1479, 1433, 1412  $\text{cm}^{-1}$ ; HRMS (ESI) calcd for  $\text{C}_{22}\text{H}_{17}\text{O}_2$  ( $\text{M} + \text{H}^+$ ) 313.1223, found 313.1222.

The following compound was prepared according to Typical Procedure V.

### 1) 10-Phenyl-2-acetylphenanthrene (**6l**)

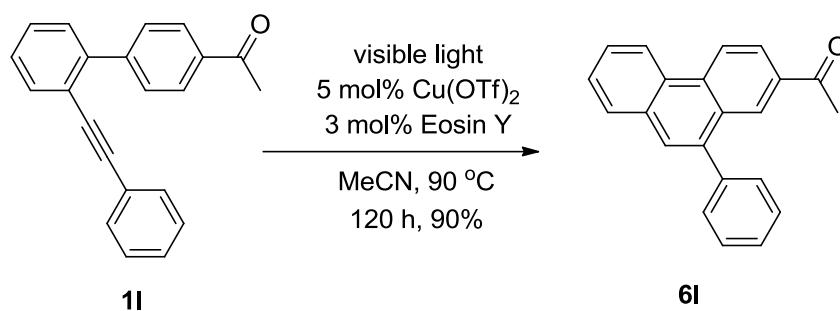

The reaction of **1l** (59 mg, 0.20 mmol),  $\text{Cu}(\text{OTf})_2$  (4 mg, 0.01 mmol), Eosin Y (4 mg, 0.006 mmol), and anhydrous MeCN (5 mL) afforded **6l** as a liquid (53 mg, 90%).  $^1\text{H}$  NMR (400 MHz,  $\text{CDCl}_3$ )  $\delta$  8.83 (d,  $J = 8.8$  Hz, 1 H), 8.74 (d,  $J = 7.6$  Hz, 1 H), 8.55 (s, 1 H), 8.23 (d,  $J = 8.8$  Hz, 1 H), 7.93 (d,  $J = 7.2$  Hz, 1 H), 7.79-7.63 (m, 3 H), 7.58-7.44 (m, 5 H), 2.59 (s, 3 H);  $^{13}\text{C}$  NMR (100 MHz,  $\text{CDCl}_3$ )  $\delta$  198.1, 140.0, 139.2, 134.8, 133.8, 132.5, 130.6, 130.0, 129.3, 128.8, 128.5, 128.4, 128.3, 128.0, 127.8, 127.0, 124.9, 123.4, 123.2, 26.6; IR (neat) 1680, 1598, 1571, 1525, 1494, 1446, 1409; HRMS (ESI) calcd for  $\text{C}_{22}\text{H}_{17}\text{O}$  ( $\text{M} + \text{H}^+$ ) 297.1274, found 297.1276.

### 2) 10-(4-Methoxyphenyl)-2-acetylphenanthrene (**6o**)

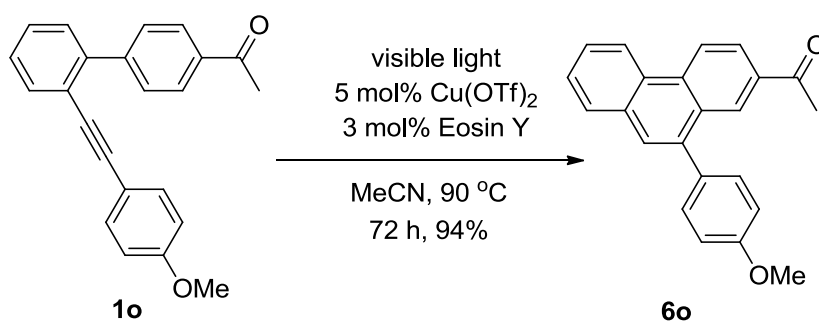

The reaction of **1o** (65 mg, 0.20 mmol),  $\text{Cu}(\text{OTf})_2$  (4 mg, 0.01 mmol), Eosin Y (4 mg,

0.006 mmol), and anhydrous MeCN (5 mL) afforded **6o**<sup>2</sup> as a solid (61 mg, 94%). <sup>1</sup>H NMR (400 MHz, CDCl<sub>3</sub>) δ 8.81 (d, *J* = 8.8 Hz, 1 H), 8.73 (d, *J* = 7.2 Hz, 1 H), 8.58 (s, 1 H), 8.22 (d, *J* = 10.0 Hz, 1 H), 7.91 (d, *J* = 8.8 Hz, 1 H), 7.77-7.61 (m, 3 H), 7.48 (d, *J* = 8.4 Hz, 2 H), 7.09 (d, *J* = 8.8 Hz, 2 H), 3.93 (s, 3 H), 2.61 (s, 3 H).

### 3) 10-(4-Methoxyphenyl)-6-methyl-2-methoxycarbonylphenanthrene (**6u**)

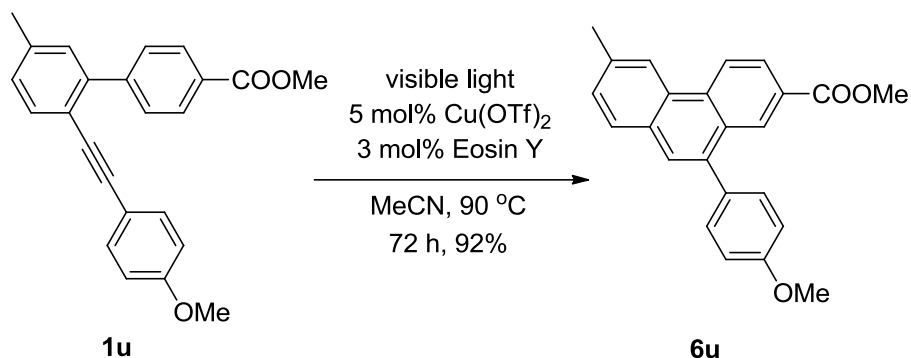

The reaction of **1u** (71 mg, 0.20 mmol), Cu(OTf)<sub>2</sub> (4 mg, 0.01 mmol), Eosin Y (4 mg, 0.006 mmol), and anhydrous MeCN (5 mL) afforded **6u**<sup>2</sup> as a solid (65 mg, 92%). <sup>1</sup>H NMR (400 MHz, CDCl<sub>3</sub>) δ 8.79 (d, *J* = 8.8 Hz, 1 H), 8.66 (s, 1 H), 8.51 (s, 1 H), 8.24 (d, *J* = 8.0 Hz, 1 H), 7.79 (d, *J* = 8.0 Hz, 1 H), 7.68 (s, 1 H), 7.52-7.43 (m, 3 H), 7.07 (d, *J* = 8.0 Hz, 2 H), 3.92 (s, 6 H), 2.65 (s, 3 H).

### 4) 10-(4-Methoxyphenyl)-6-methyl-2-nitrophenanthrene (**6v**)

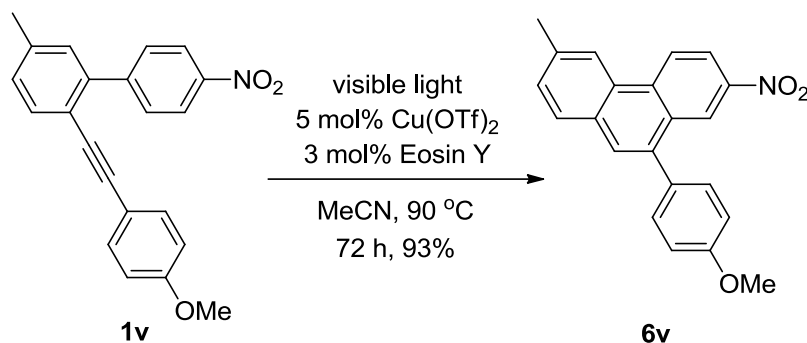

The reaction of **1v** (69 mg, 0.20 mmol), Cu(OTf)<sub>2</sub> (4 mg, 0.01 mmol), Eosin Y (4 mg, 0.006 mmol), and anhydrous MeCN (5 mL) afforded **6v**<sup>2</sup> as a solid (64 mg, 93%). <sup>1</sup>H NMR (400 MHz, CDCl<sub>3</sub>) δ 8.90-8.82 (m, 2 H), 8.51 (s, 1 H), 8.41 (dd, *J* = 9.2, 2.4 Hz, 1 H), 7.84 (d, *J* = 8.4 Hz, 1 H), 7.77 (s, 1 H), 7.56 (d, *J* = 8.0 Hz, 1 H), 7.46 (d, *J* = 8.8 Hz, 2 H), 7.09 (d, *J* = 8.8 Hz, 2 H), 3.94 (s, 3 H), 2.67 (s, 3 H).

### 5) 10-(4-Methoxyphenyl)-6-methyl-2-cyanophenanthrene (**6w**)

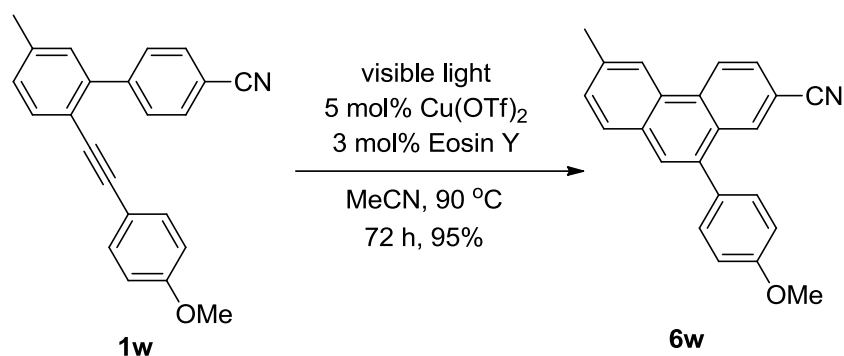

The reaction of **1w** (65 mg, 0.20 mmol), Cu(OTf)<sub>2</sub> (4 mg, 0.01 mmol), Eosin Y (4 mg, 0.006 mmol), and anhydrous MeCN (5 mL) afforded **6w**<sup>2</sup> as a solid (62 mg, 95%). <sup>1</sup>H NMR (400 MHz, CDCl<sub>3</sub>) δ 8.81 (d, *J* = 8.4 Hz, 1 H), 8.48 (s, 1 H), 8.27 (s, 1 H), 7.88-7.75 (m, 2 H), 7.73 (s, 1 H), 7.54 (d, *J* = 7.2 Hz, 1 H), 7.42 (d, *J* = 8.8 Hz, 2 H), 7.08 (d, *J* = 8.4 Hz, 2 H), 3.93 (s, 3 H), 2.66 (s, 3 H).

**6) 10-(4-Methylphenyl)-6-methyl-2-acetylphenanthrene (6z)**

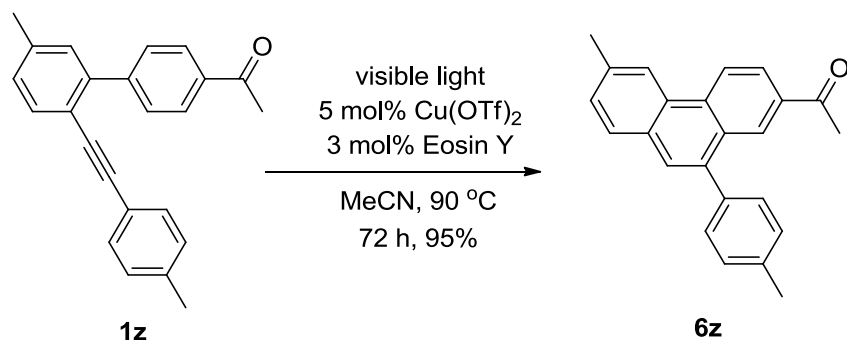

The reaction of **1z** (65 mg, 0.20 mmol), Cu(OTf)<sub>2</sub> (4 mg, 0.01 mmol), Eosin Y (4 mg, 0.006 mmol), and anhydrous MeCN (5 mL) afforded **6z** as a solid (62 mg, 95%); mp 133.6-134.5 °C (ethyl acetate/petroleum ether). <sup>1</sup>H NMR (400 MHz, CDCl<sub>3</sub>) δ 8.80 (d, *J* = 8.8 Hz, 1 H), 8.56 (s, 1 H), 8.51 (s, 1 H), 8.19 (d, *J* = 8.8 Hz, 1 H), 7.80 (d, *J* = 8.0 Hz, 1 H), 7.70 (s, 1 H), 7.50 (d, *J* = 8.0 Hz, 1 H), 7.44 (d, *J* = 8.0 Hz, 2 H), 7.35 (d, *J* = 7.6 Hz, 2 H), 2.65 (s, 3 H), 2.60 (s, 3 H), 2.49 (s, 3 H); <sup>13</sup>C NMR (100 MHz, CDCl<sub>3</sub>) δ 198.2, 138.2, 137.3, 137.2, 136.7, 134.7, 133.5, 130.8, 130.6, 129.9, 129.8, 129.3, 129.2, 128.6, 128.4, 128.2, 124.6, 123.3, 122.9, 26.7, 22.2, 21.3; IR (neat) 1680, 1607, 1592, 1571, 1522, 1503, 1494, 1446, 1421; HRMS (ESI) calcd for C<sub>24</sub>H<sub>21</sub>O (M + H<sup>+</sup>) 325.1587, found 325.1593.

**7) 10-(4-Methylphenyl)-6-methyl-2-trifluoromethylphenanthrene (6aa)**

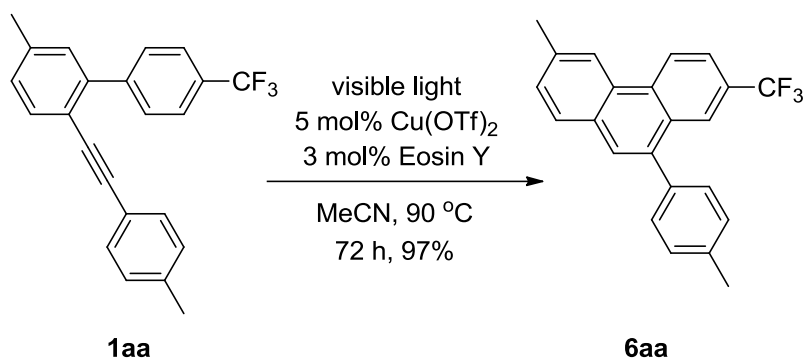

The reaction of **1aa** (70 mg, 0.20 mmol), Cu(OTf)<sub>2</sub> (4 mg, 0.01 mmol), Eosin Y (4 mg, 0.006 mmol), and anhydrous MeCN (5 mL) afforded **6aa** as a solid (68 mg, 97%); mp 100.6-101.3 °C (ethyl acetate/petroleum ether). <sup>1</sup>H NMR (400 MHz, CDCl<sub>3</sub>) δ 8.83 (d, *J* = 8.8 Hz, 1 H), 8.49 (s, 1 H), 8.23 (s, 1 H), 7.84-7.76 (m, 2 H), 7.71 (s, 1 H), 7.49 (dd, *J* = 8.0, 0.8 Hz, 1 H), 7.41 (d, *J* = 7.6 Hz, 2 H), 7.34 (d, *J* = 8.0 Hz, 2 H), 2.64 (s, 3 H), 2.48 (s, 3 H); <sup>13</sup>C NMR (100 MHz, CDCl<sub>3</sub>) δ 137.7, 137.4, 137.0, 136.8, 132.4, 130.8, 130.2, 129.8, 129.6, 129.3, 129.2, 128.6, 128.2, 127.9, 124.2 (q, *J* = 4.2 Hz), 123.7, 122.6, 122.0 (q, *J* = 3.3 Hz), 22.2, 21.3; <sup>19</sup>F NMR (376 MHz, CDCl<sub>3</sub>) δ -61.8; IR (neat) 1625, 1607, 1558, 1503, 1497, 1458, 1452, 1436, 1418; HRMS (EI, 70 eV) calcd for C<sub>23</sub>H<sub>17</sub>F<sub>3</sub> 350.1282, found 350.1280.

# NMR Spectra

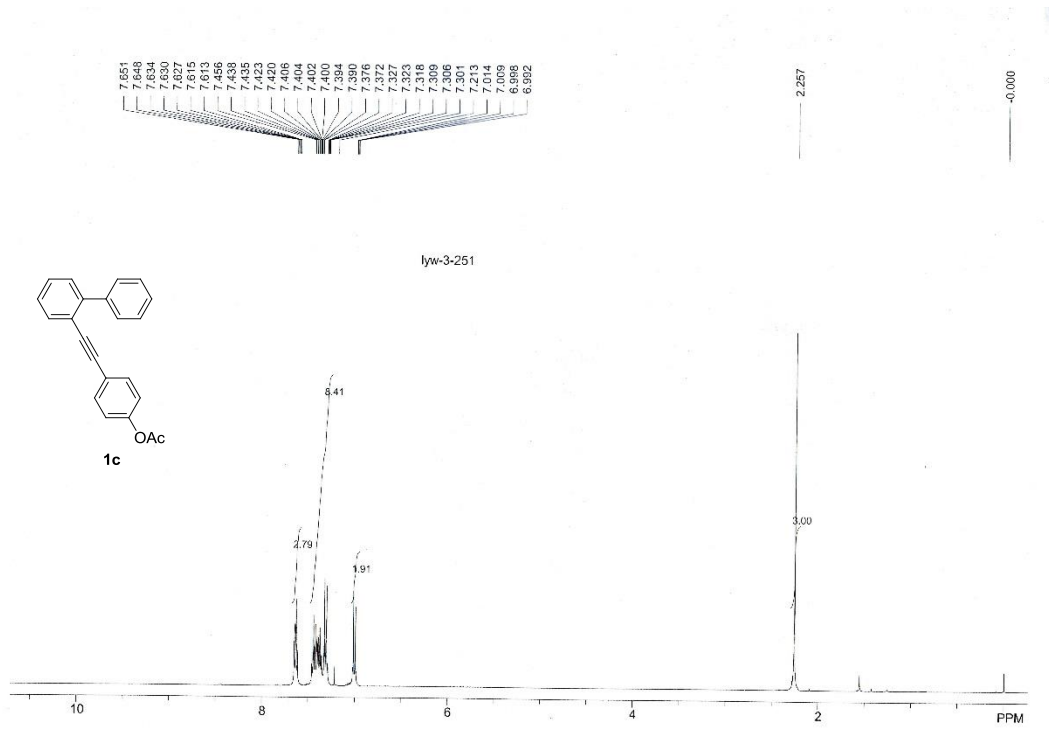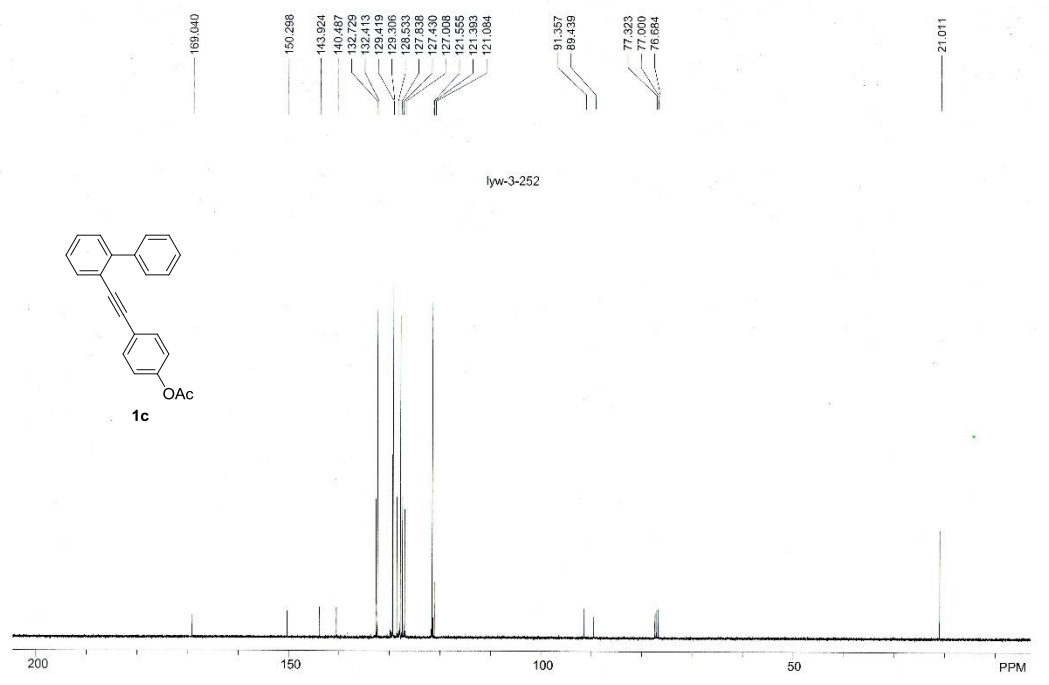



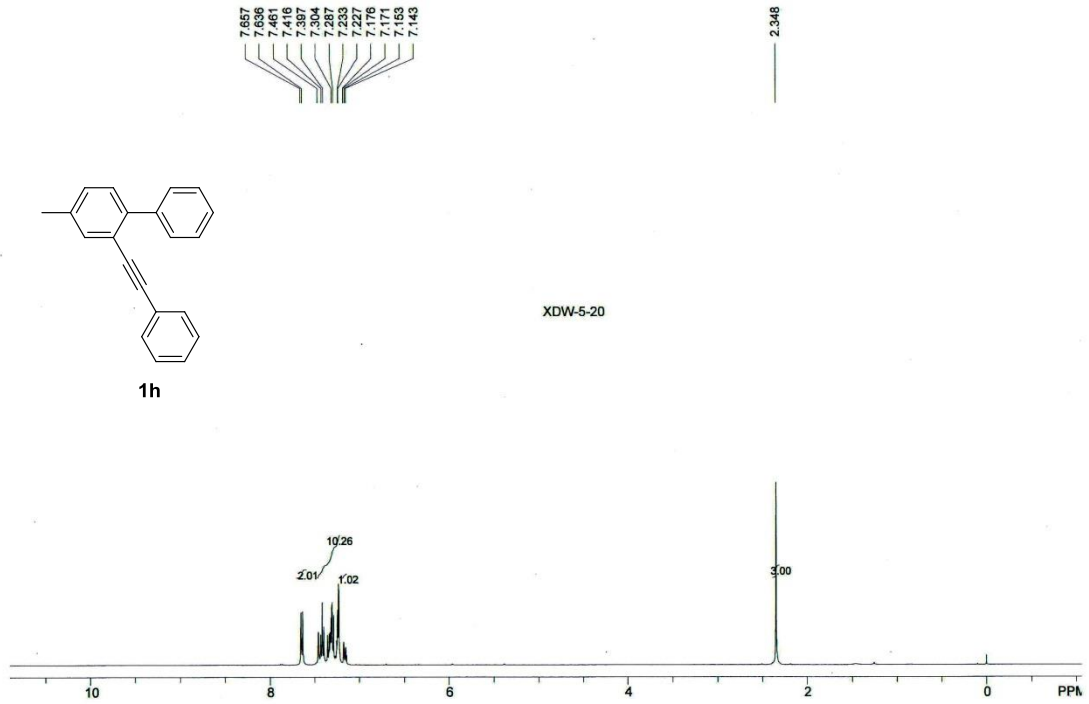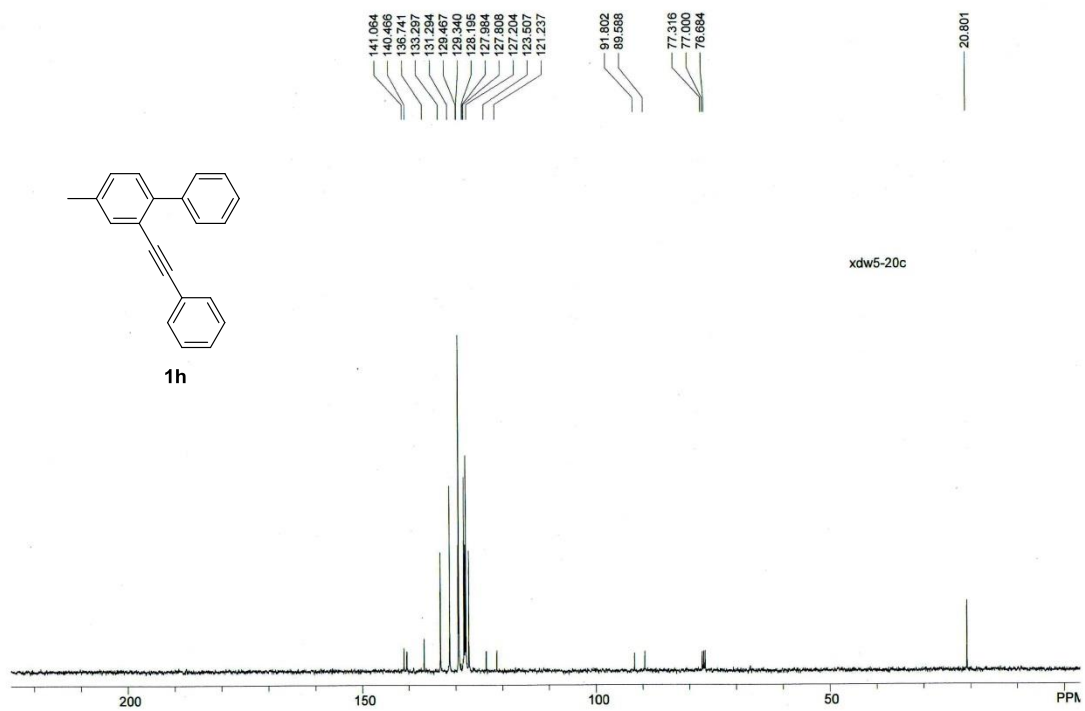

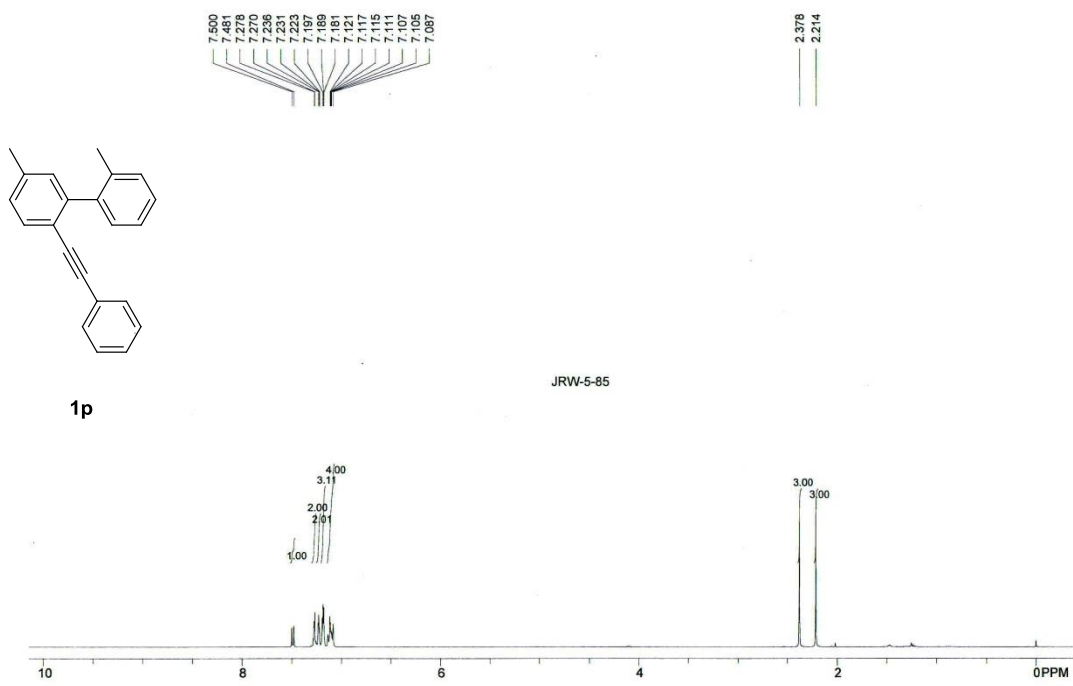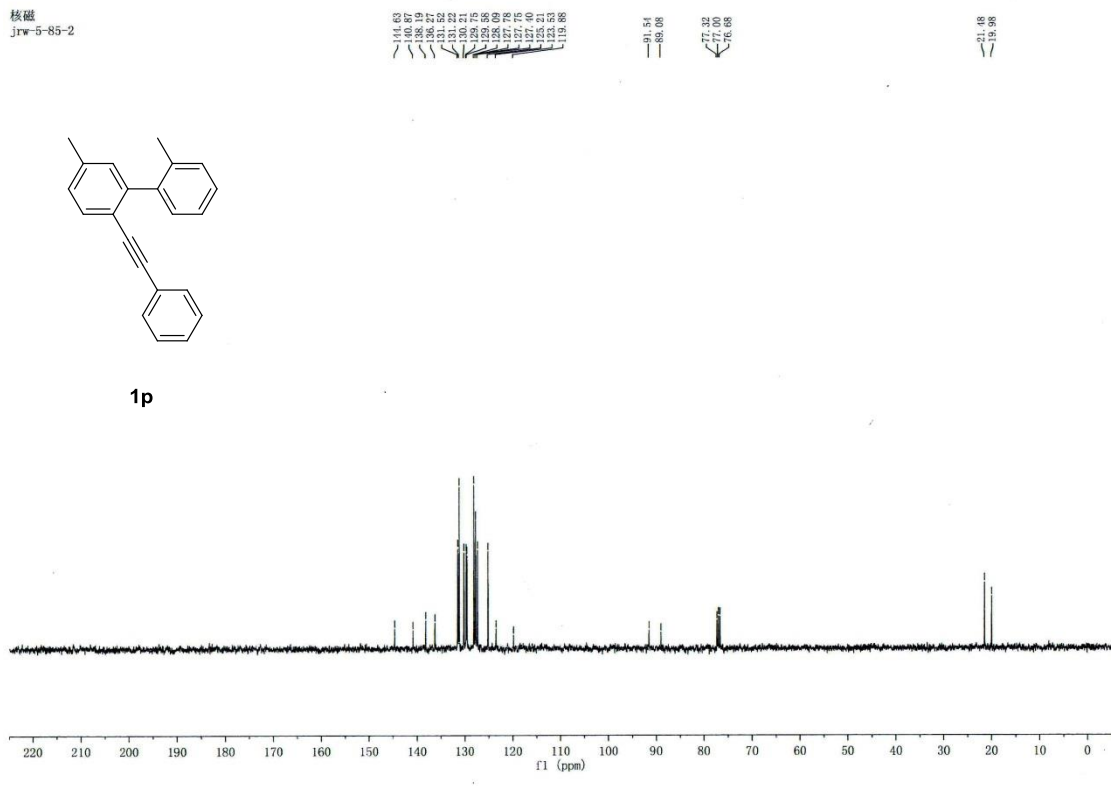

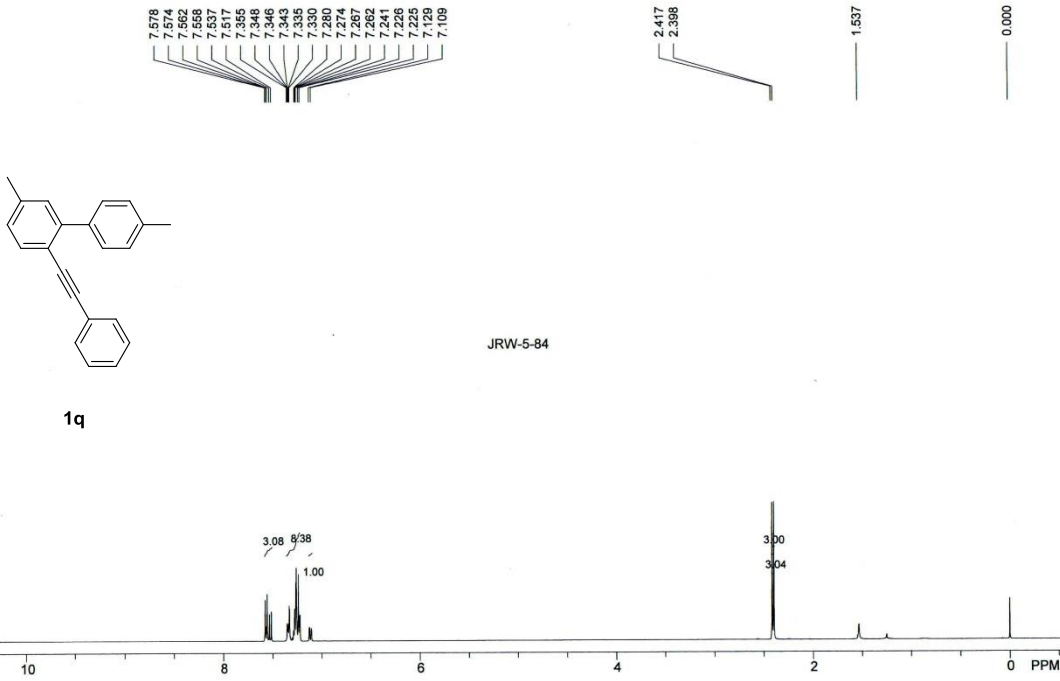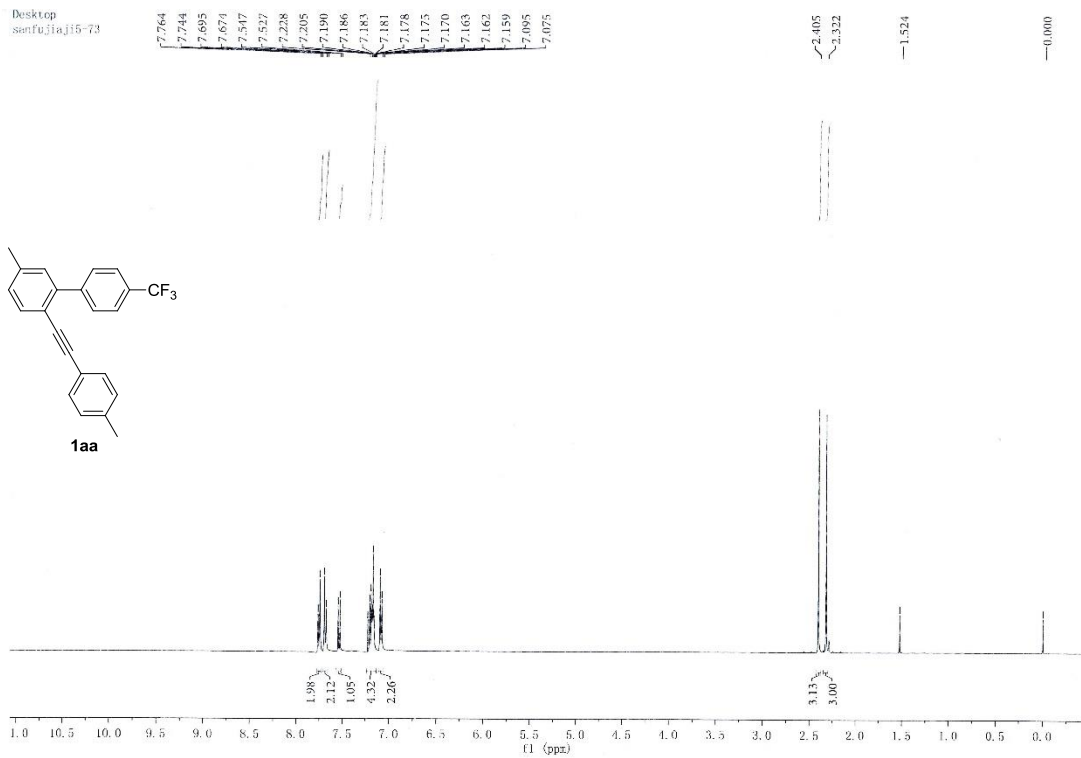

Desktop  
sanjujiaji5 73 C

144.334  
142.067  
138.630  
138.338  
132.829  
131.112  
130.073  
129.694  
129.078  
128.629  
124.756  
124.722  
120.179  
118.872

92.263  
88.168  
77.317  
77.000  
76.681

21.444

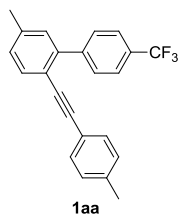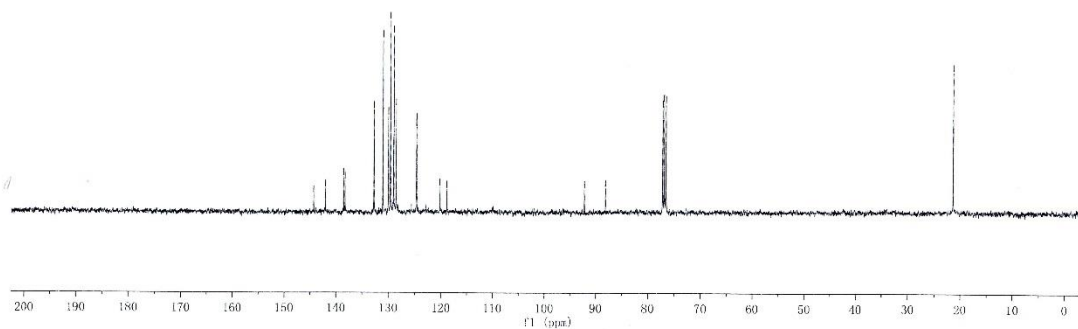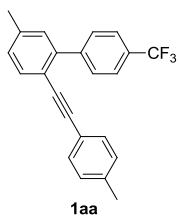

lws-5-73

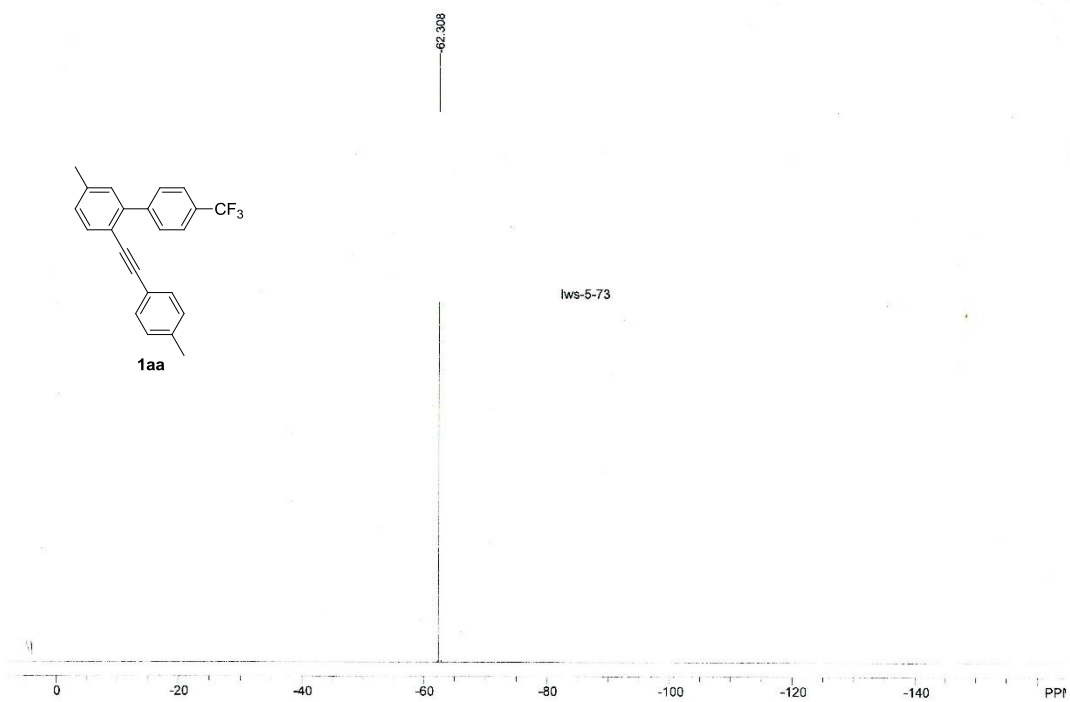

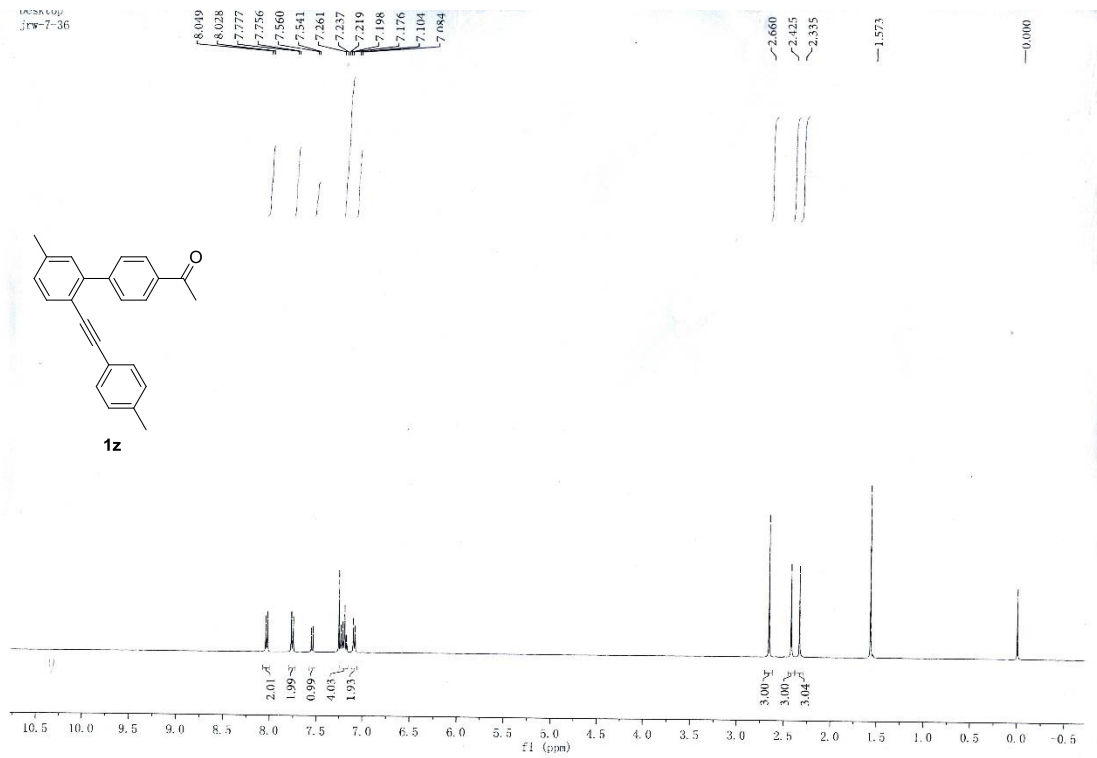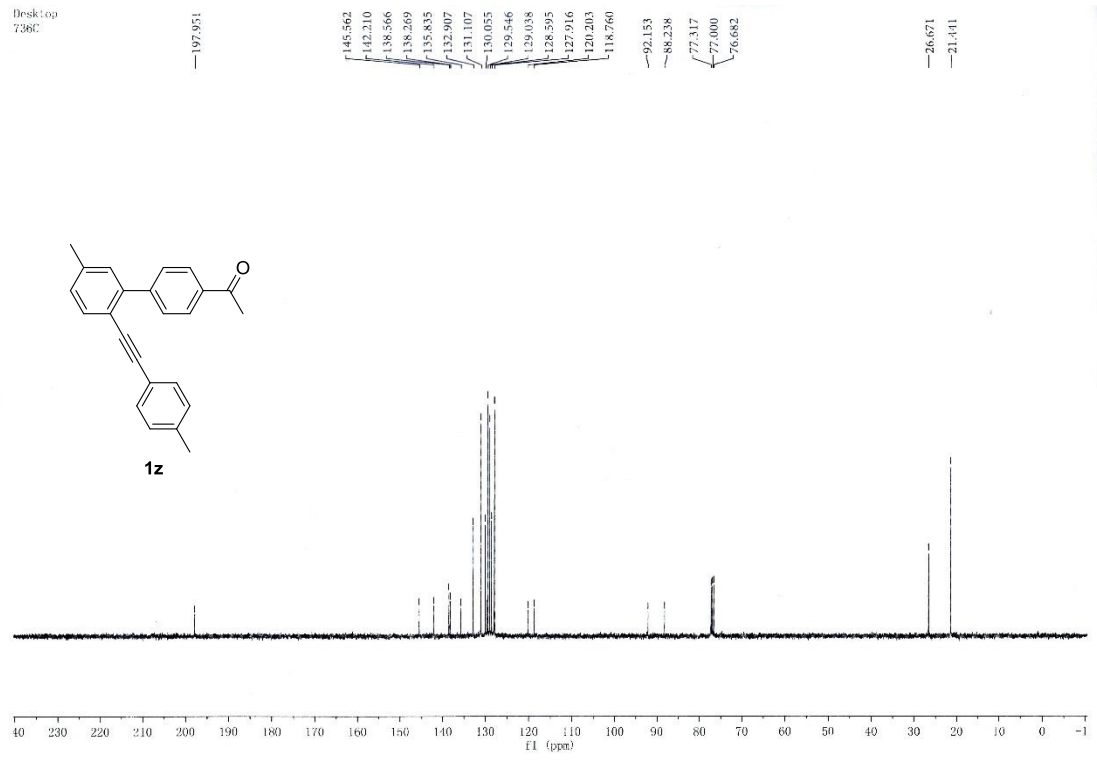

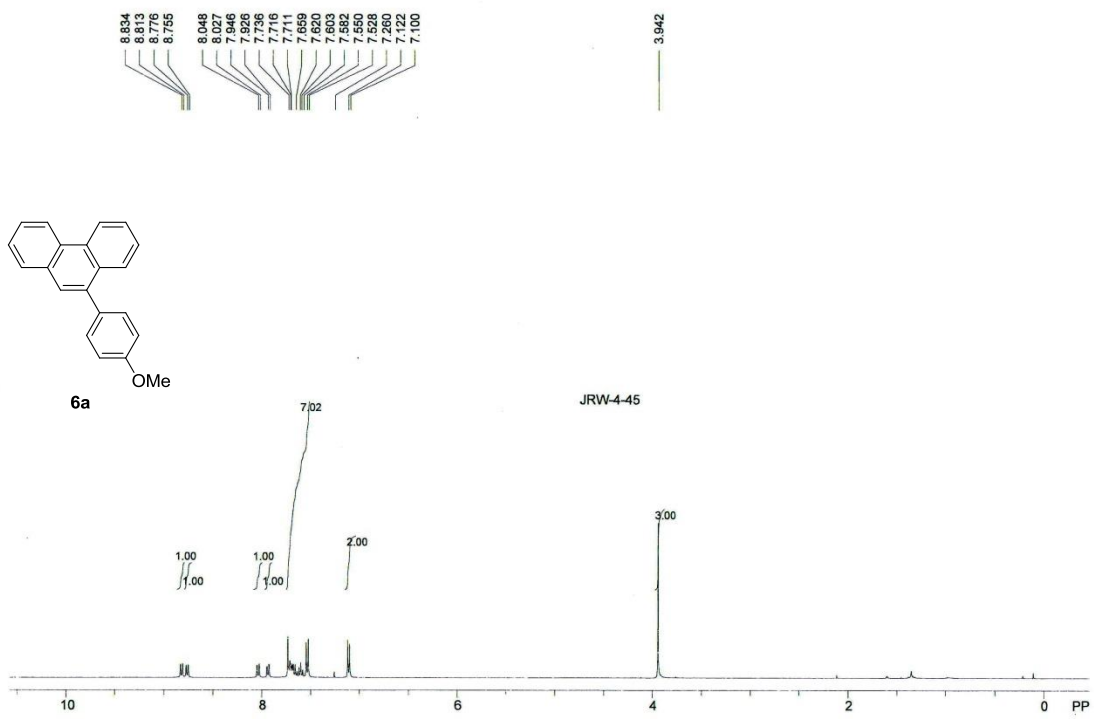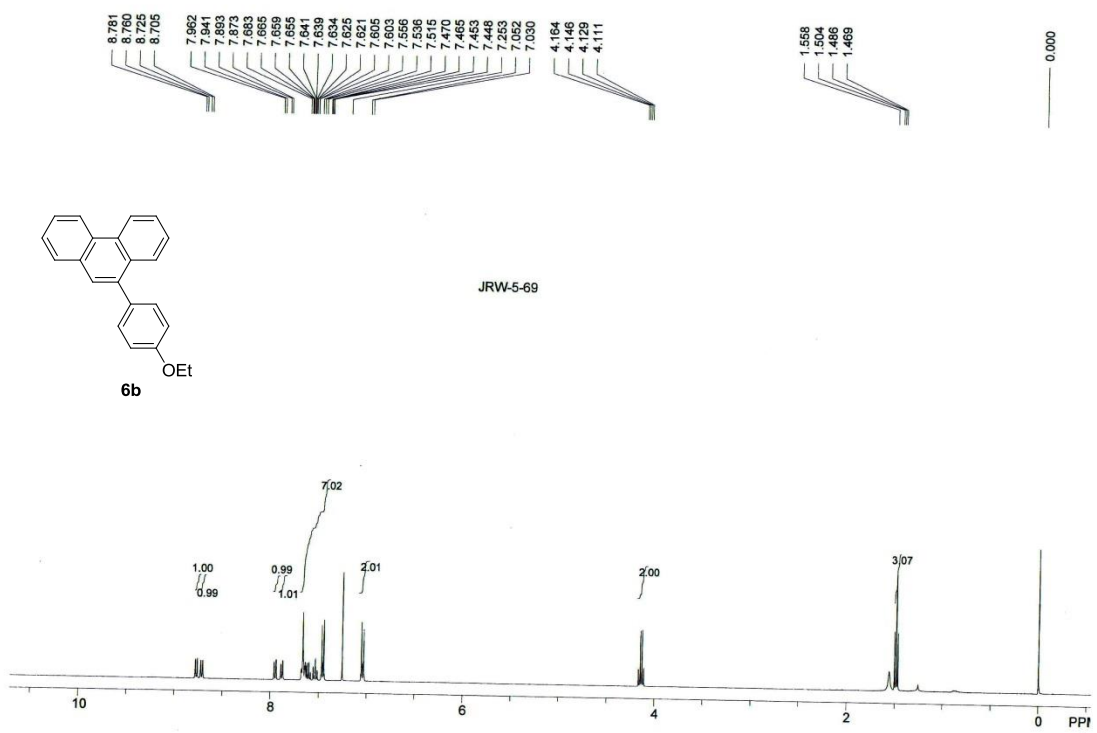

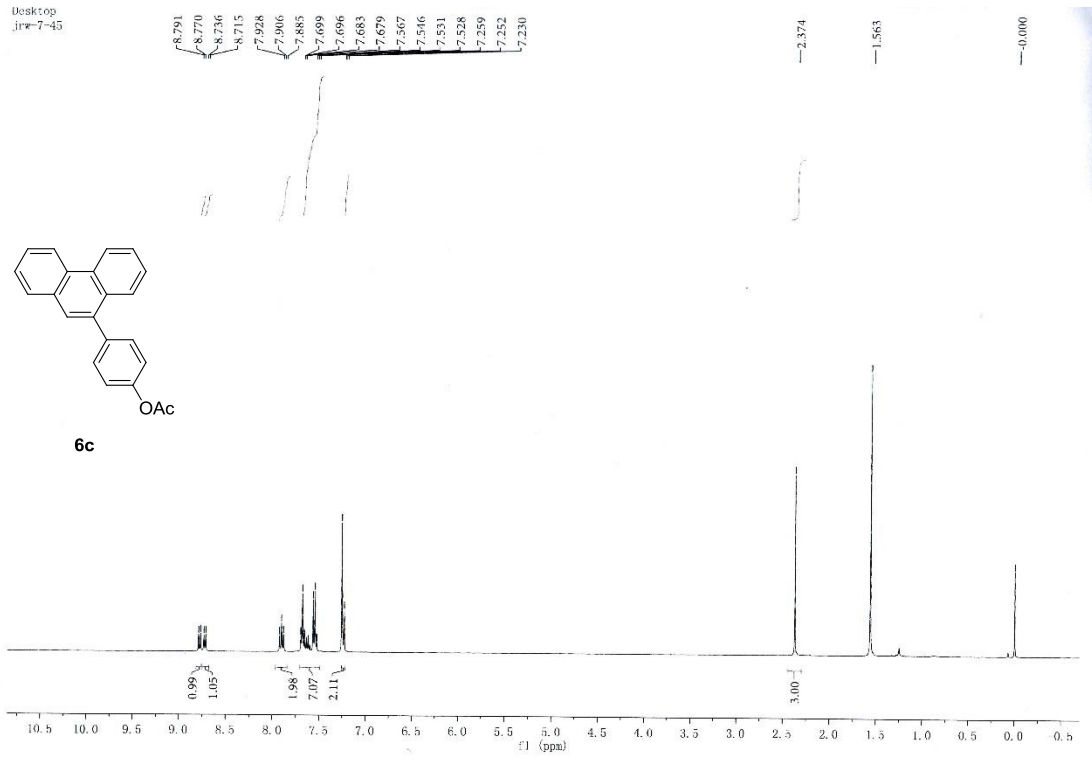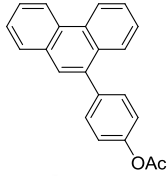

6c

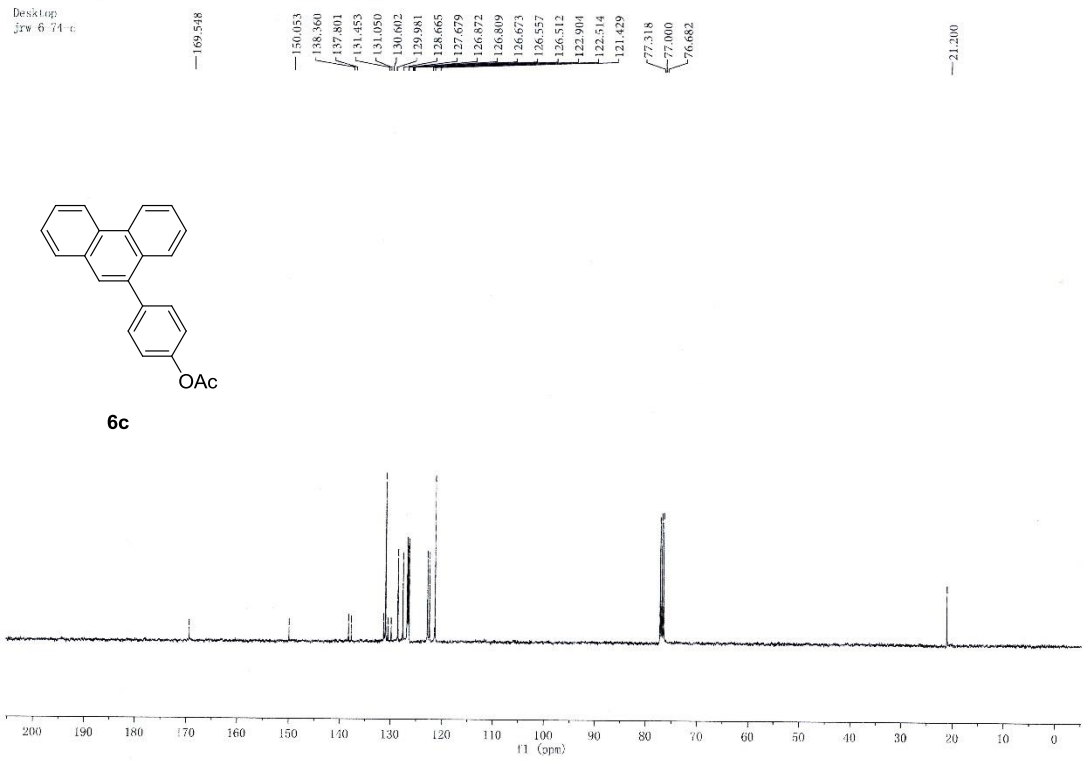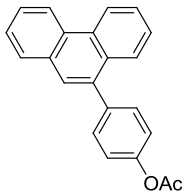

6c

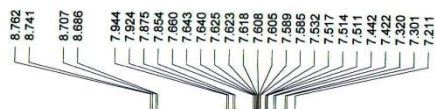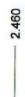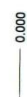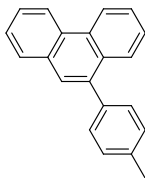

JRW-5-21

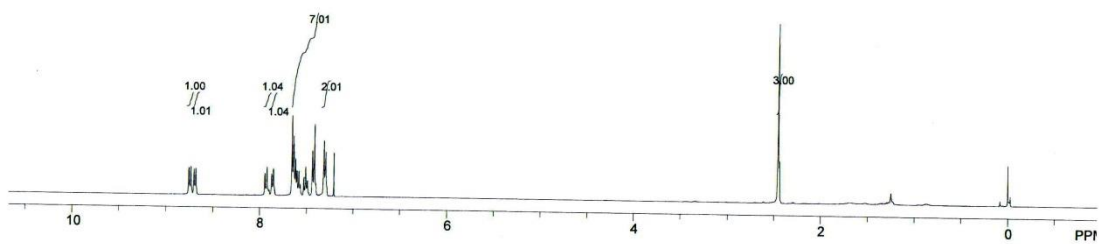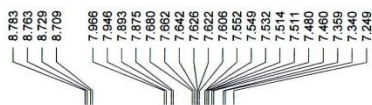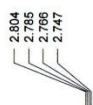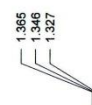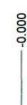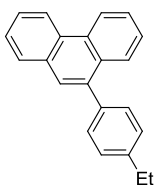

JRW-5-47

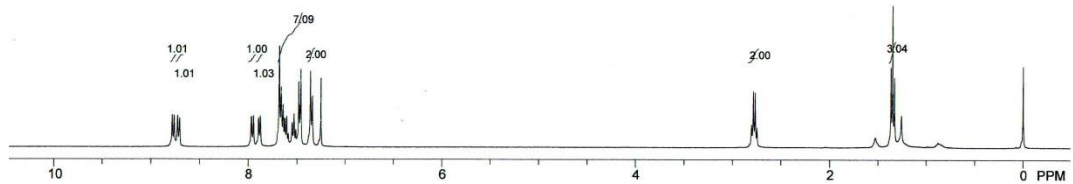



JRW-5-47-c

143.37  
138.77  
137.99  
131.61  
131.22  
129.07  
128.86  
128.78  
127.79  
127.43  
126.79  
126.44  
126.11  
125.36  
122.84  
122.19

77.32  
77.00  
76.68

28.67

15.61

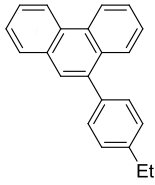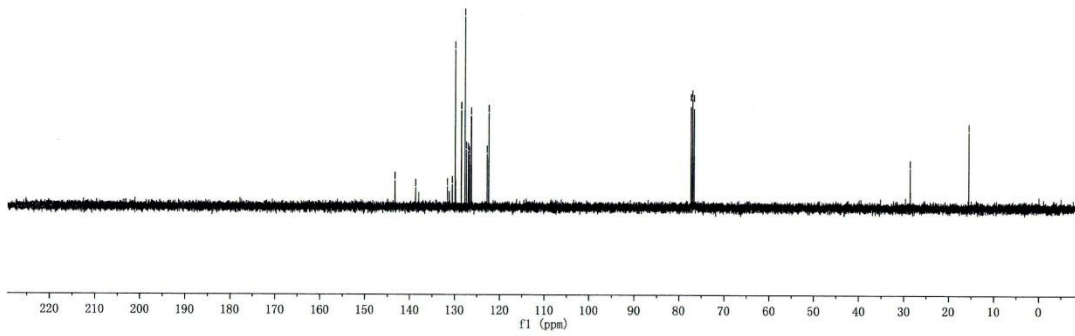

8.769  
8.769  
8.736  
8.716  
7.925  
7.904  
7.885  
7.687  
7.673  
7.669  
7.653  
7.634  
7.631  
7.554  
7.552  
7.514  
7.472  
7.452  
7.457

1.538

-0.000

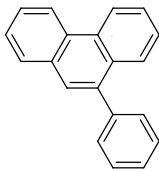

JRW-5-23

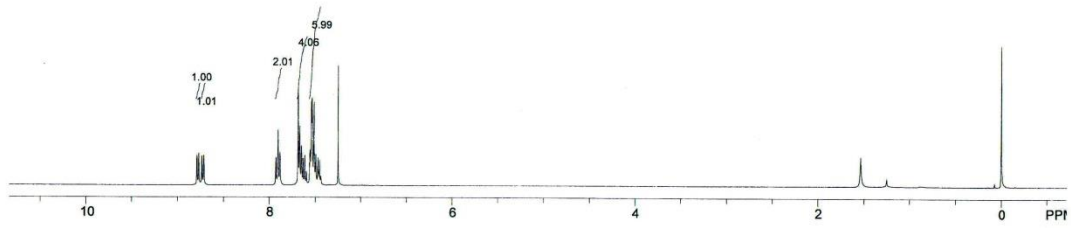

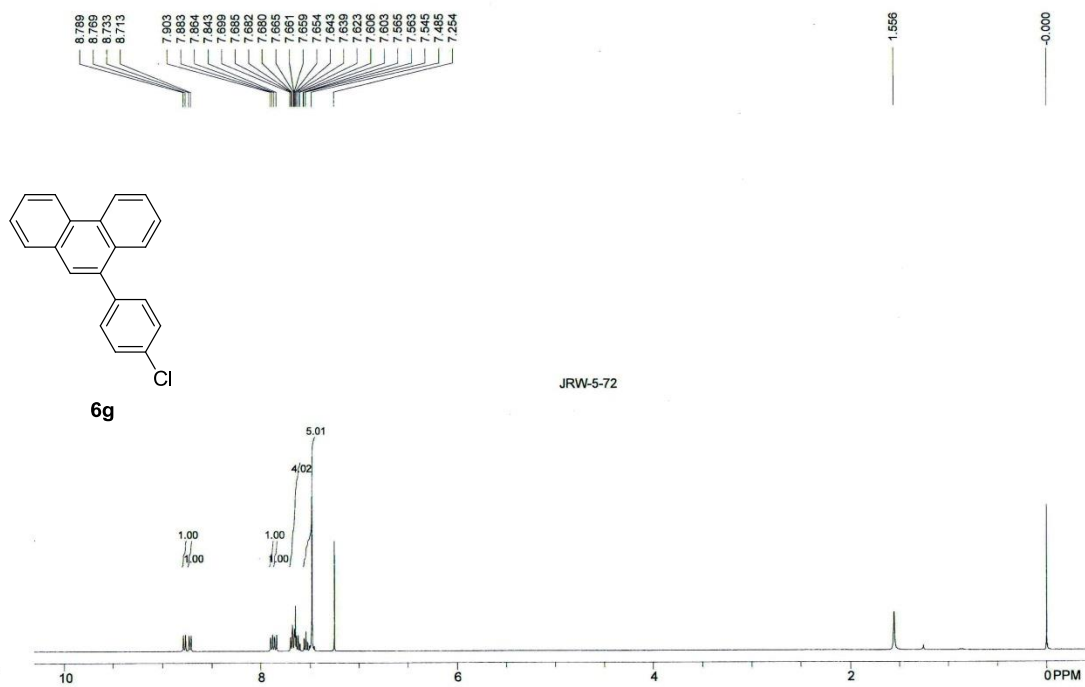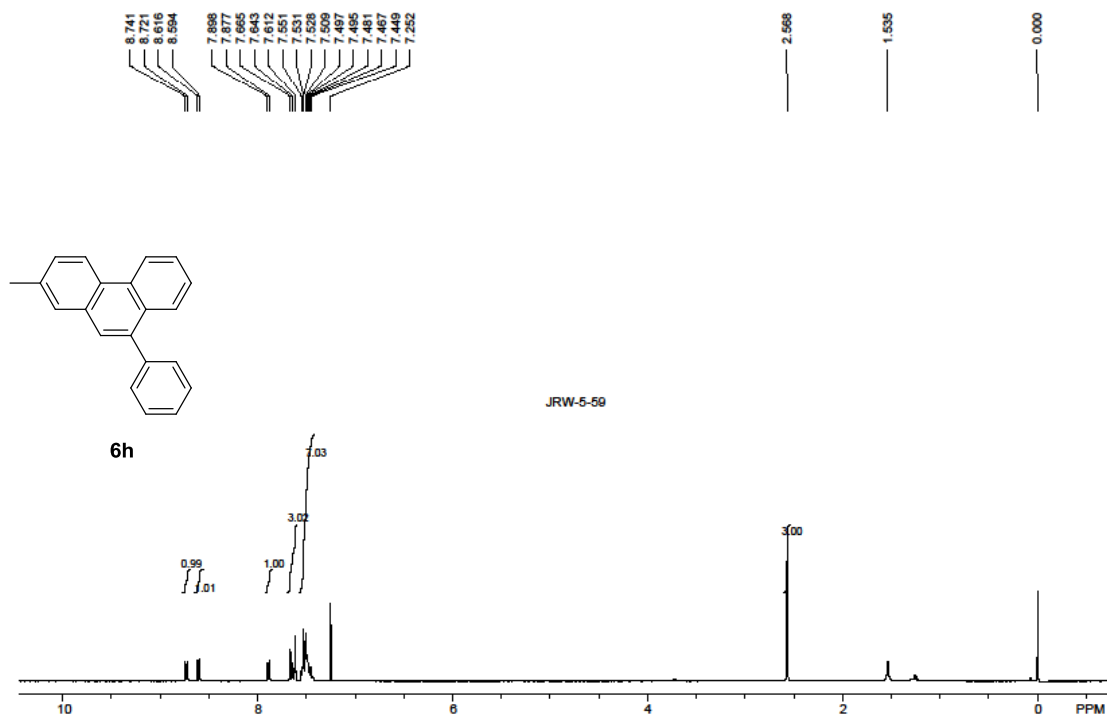

JRW-5-59-c

140.92  
138.71  
136.60  
135.62  
130.76  
130.61  
128.38  
128.29  
127.81  
127.28  
126.35  
125.03  
122.13

77.02  
76.98

21.48

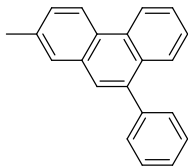

6h

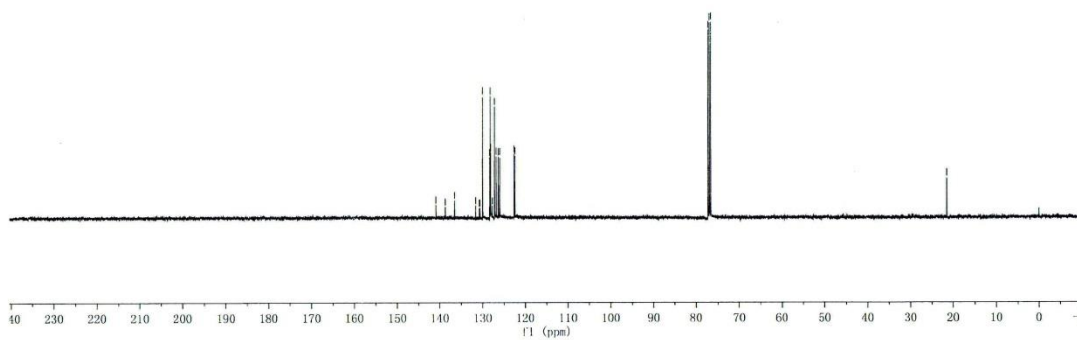

8.703  
8.682  
8.634  
8.612  
7.911  
7.890  
7.847  
7.889  
7.671  
7.650  
7.603  
7.578  
7.557  
7.520  
7.537  
7.523  
7.513  
7.475  
7.464  
7.246

1.534

0.000

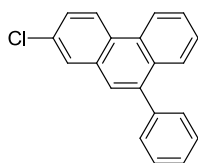

6i

JRW-5-77

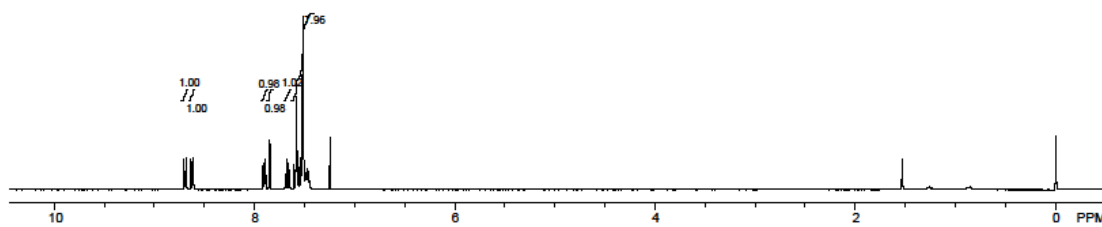

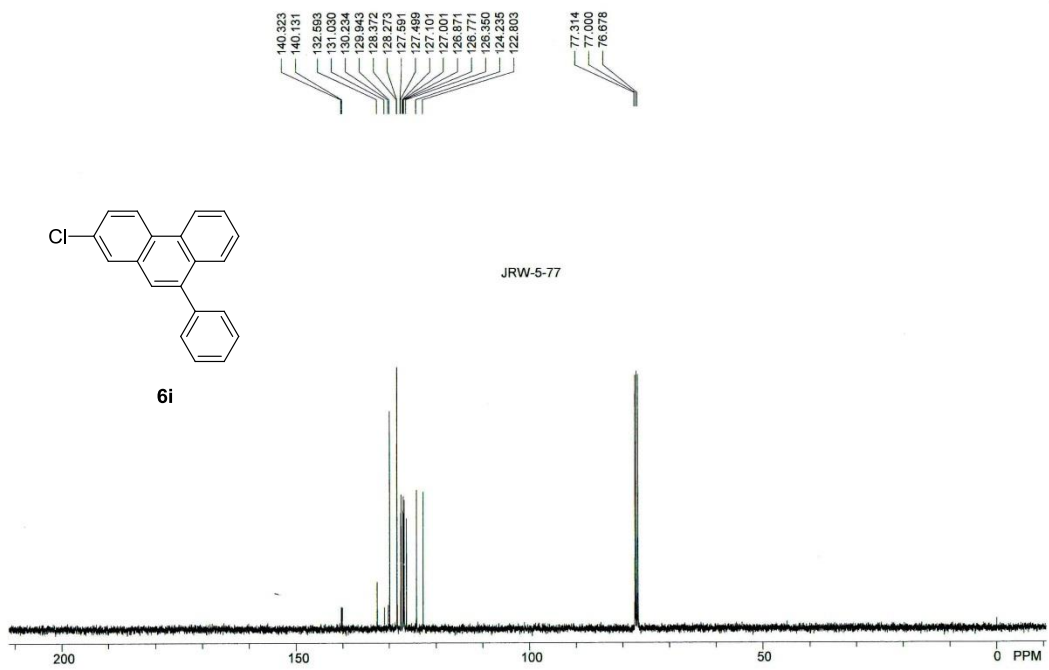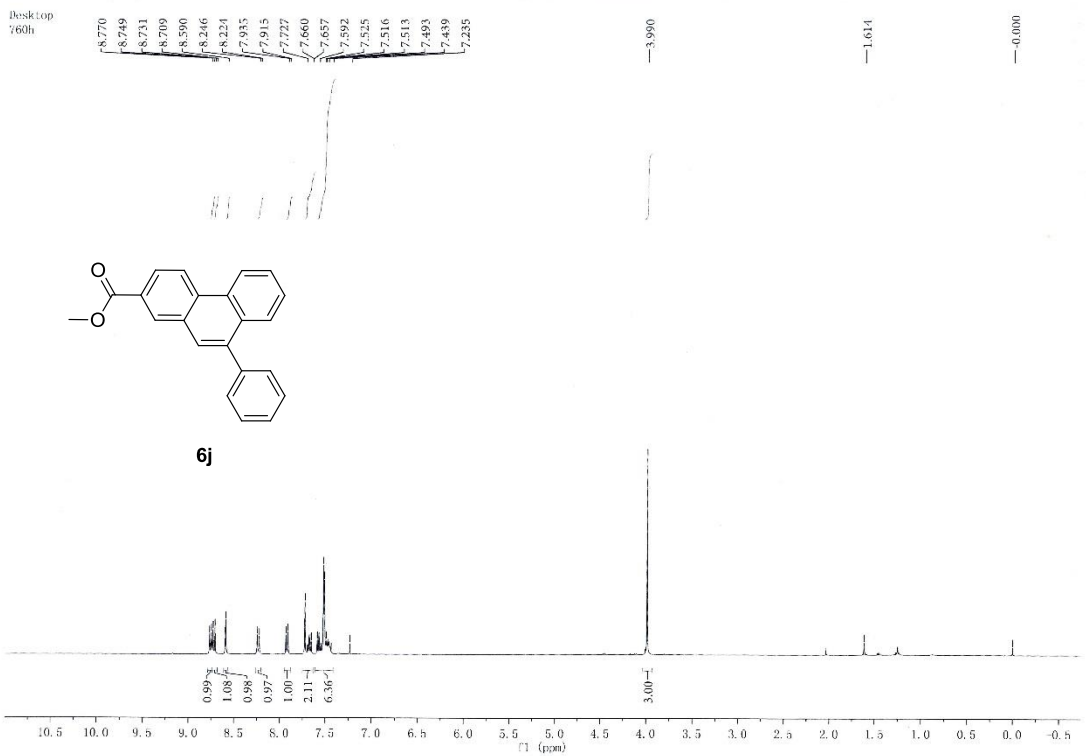

BeskiTop  
760C

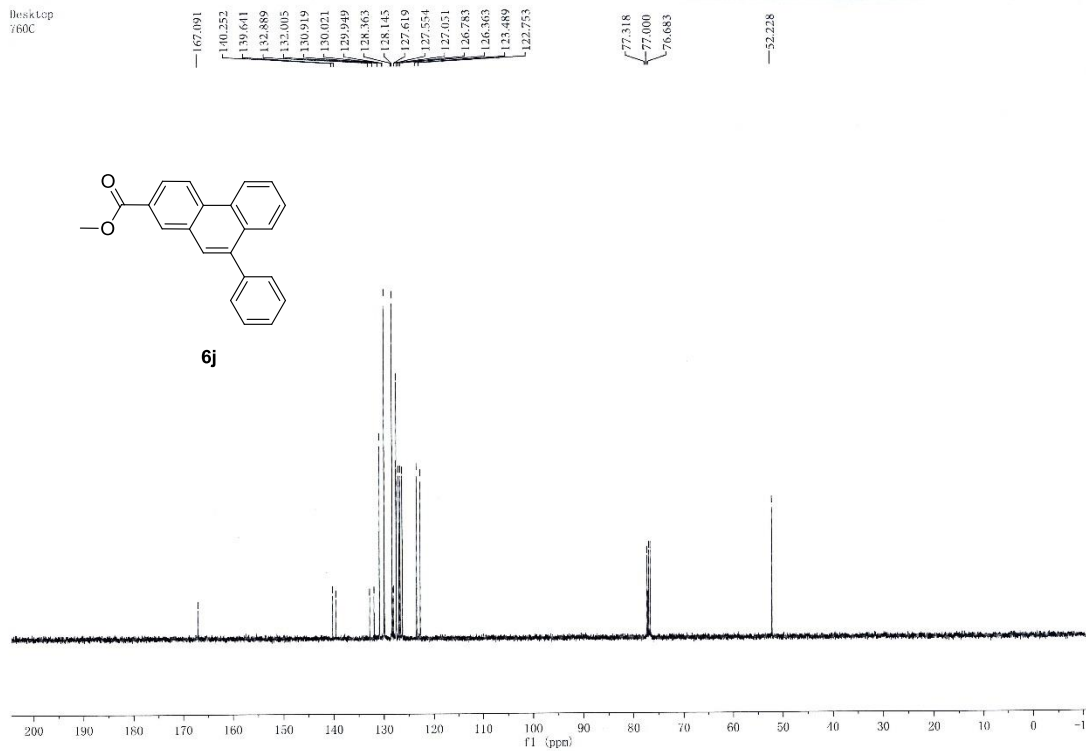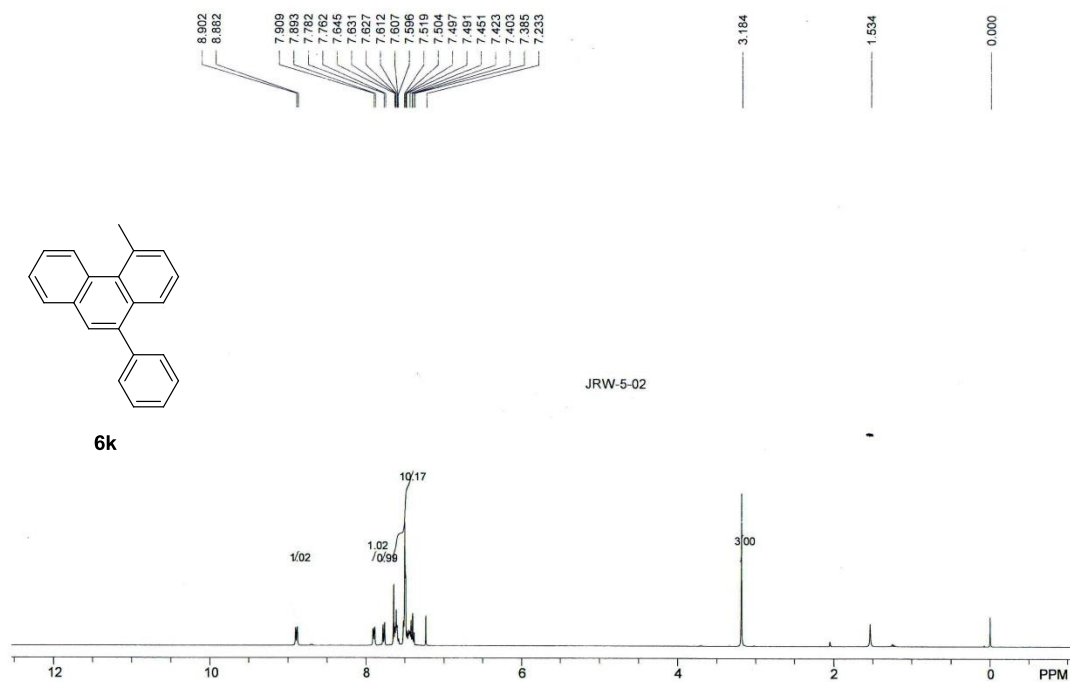

Desktop  
765h

8.838  
8.816  
8.752  
8.733  
8.549  
8.239  
8.217  
7.936  
7.918  
7.759  
7.698  
7.680  
7.666  
7.563  
7.554  
7.552  
7.484  
7.473  
7.255

2.593

1.584

0.000

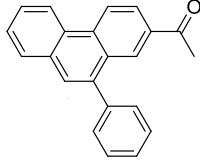

61

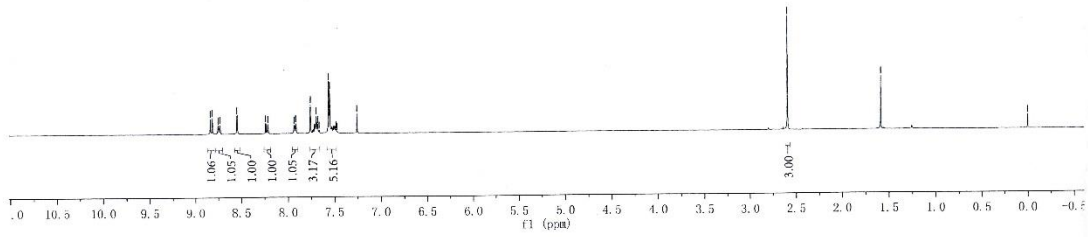

Desktop  
765h

198.136

140.017  
139.208  
134.845  
133.783  
132.515  
130.595  
129.994  
129.306  
128.796  
128.535  
128.428  
128.329  
128.041  
127.768  
127.008  
124.927  
123.615  
123.203

77.317  
77.000  
76.682

26.632

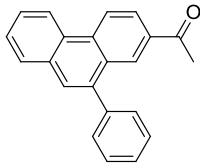

61

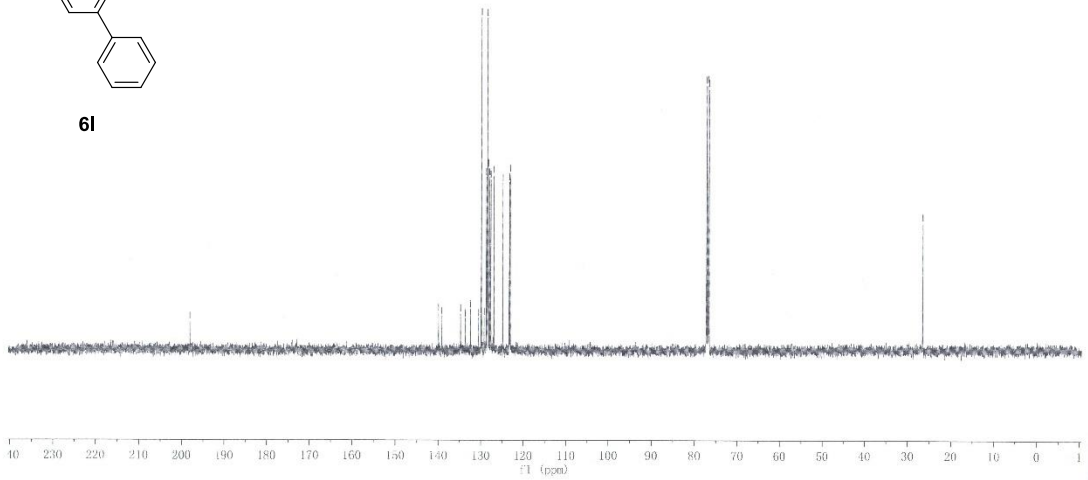

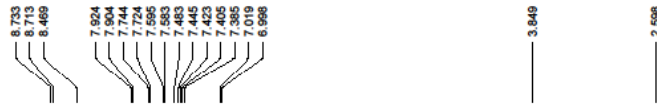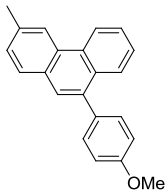

6m

JRW-5-49

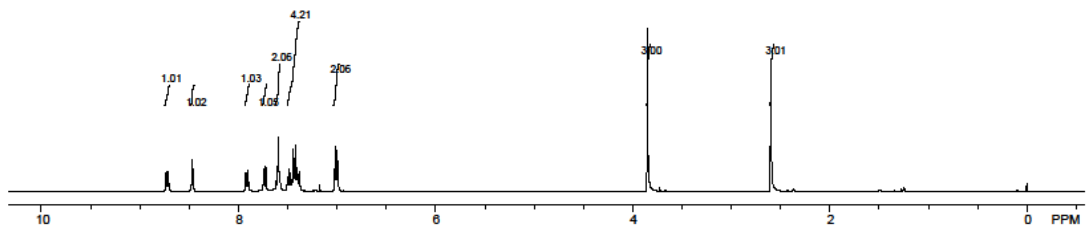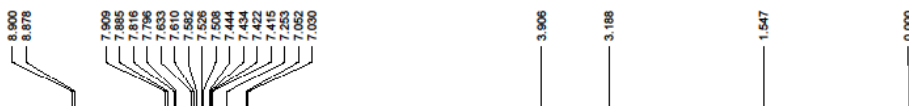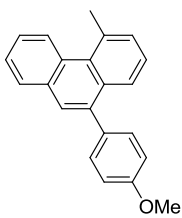

6n

JRW-5-18

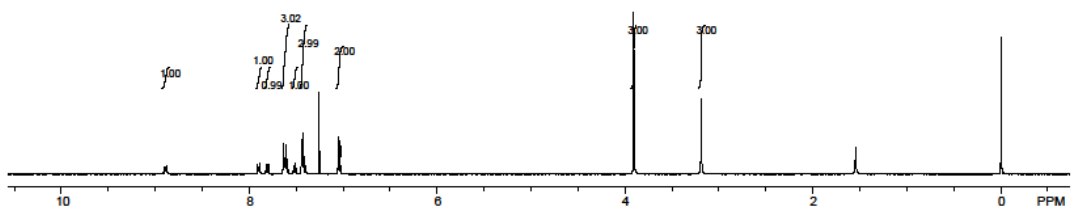

H:  
jr w 7-58-2

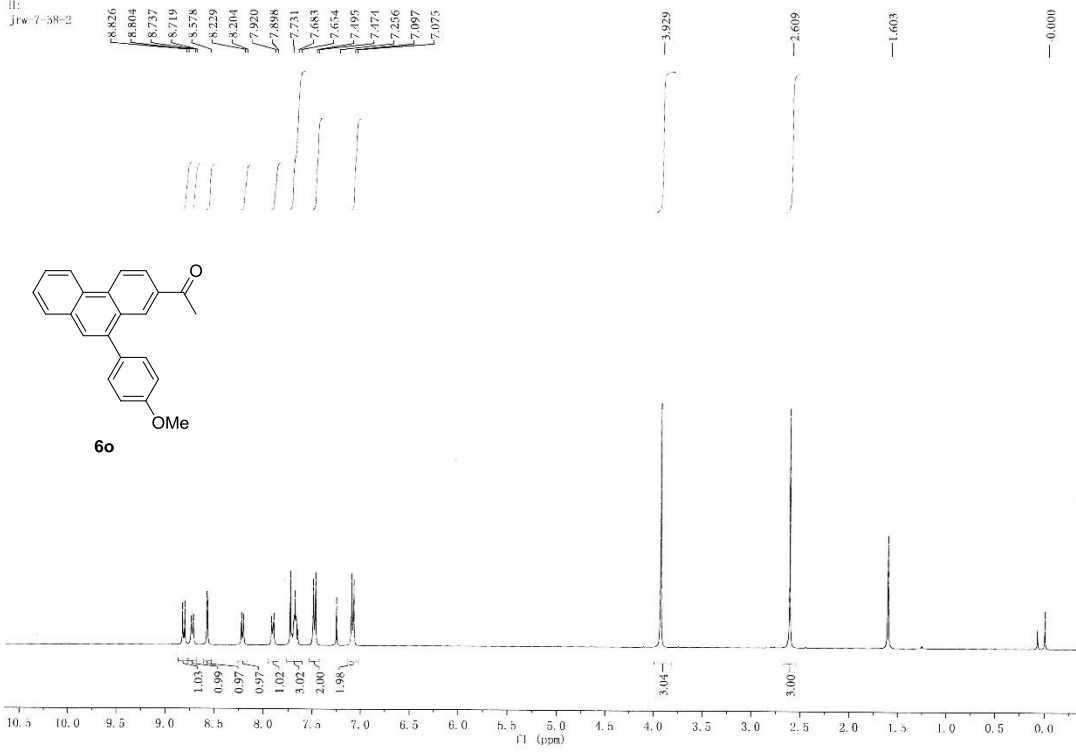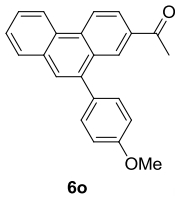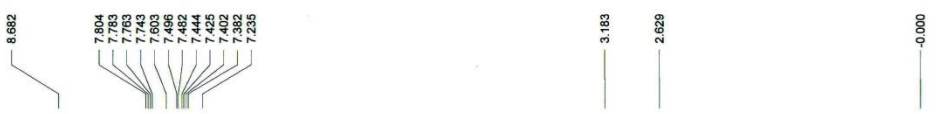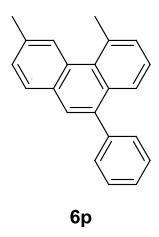

JRW-5-31

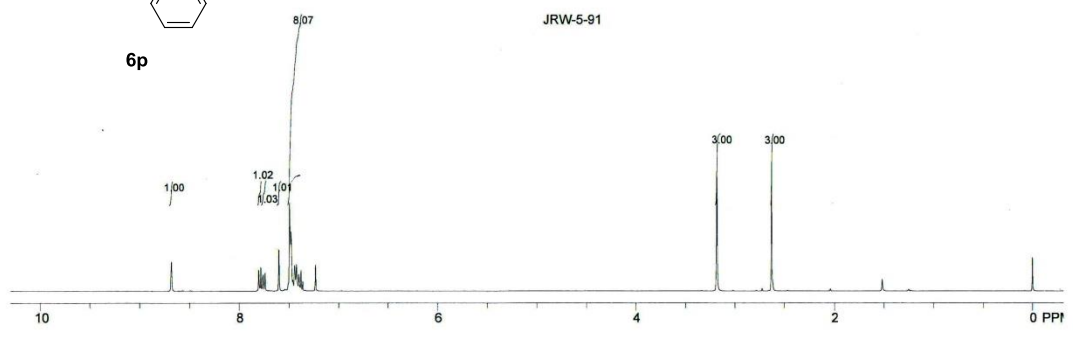



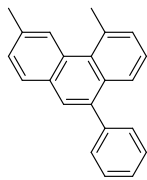

6p

141.603  
138.278  
135.555  
134.967  
132.977  
131.675  
131.275  
130.753  
130.366  
130.119  
128.544  
128.194  
127.727  
127.576  
127.122  
125.496  
125.481

77.314  
77.000  
76.679

27.600  
22.474

JRW-5-91

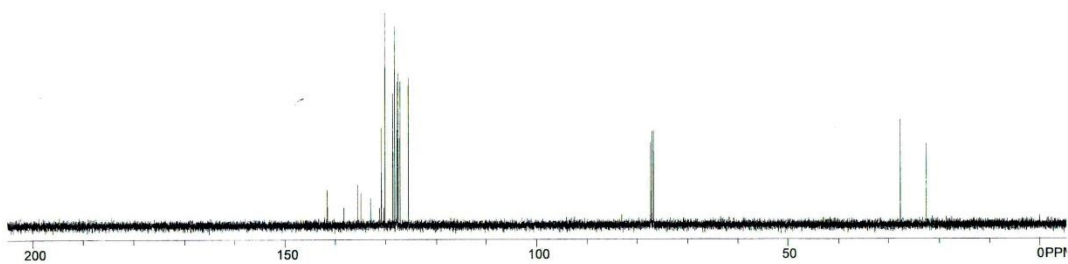

8.651  
8.630  
8.458  
7.762  
7.742  
7.693  
7.690  
7.543  
7.527  
7.523  
7.504  
7.500  
7.485  
7.478  
7.474  
7.469  
7.464  
7.442  
7.412  
7.409  
7.392  
7.389  
7.235

2.624  
2.455

1.529

0.000

JRW-5-93

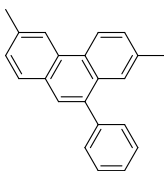

6q

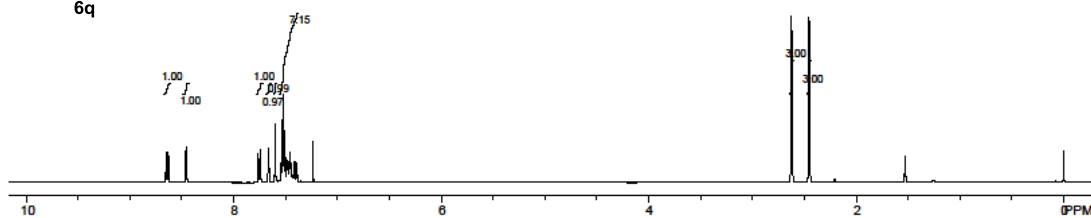

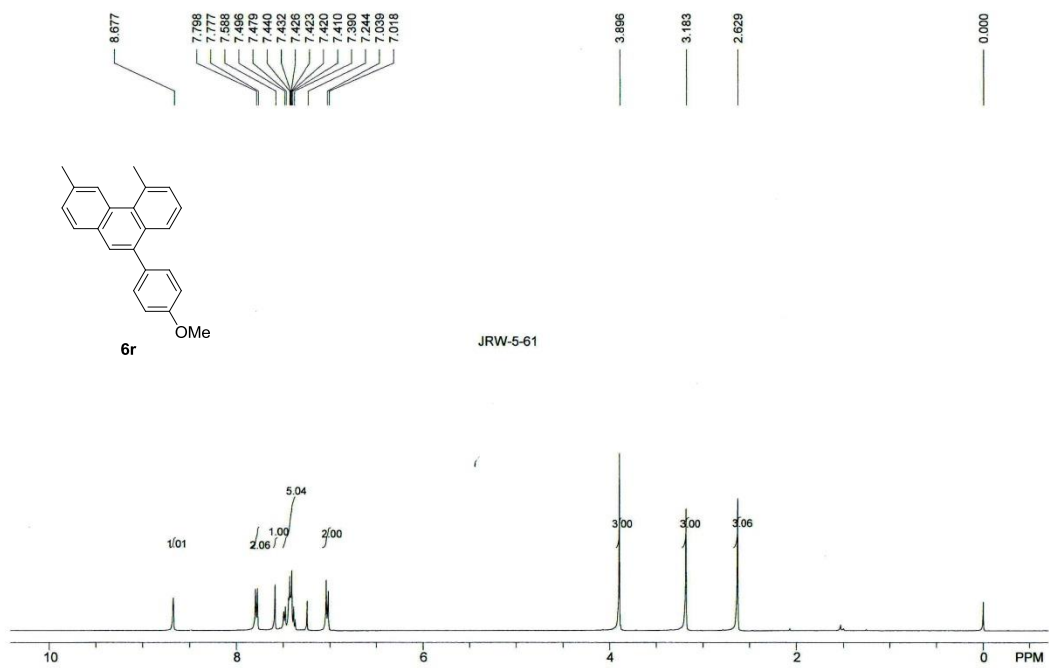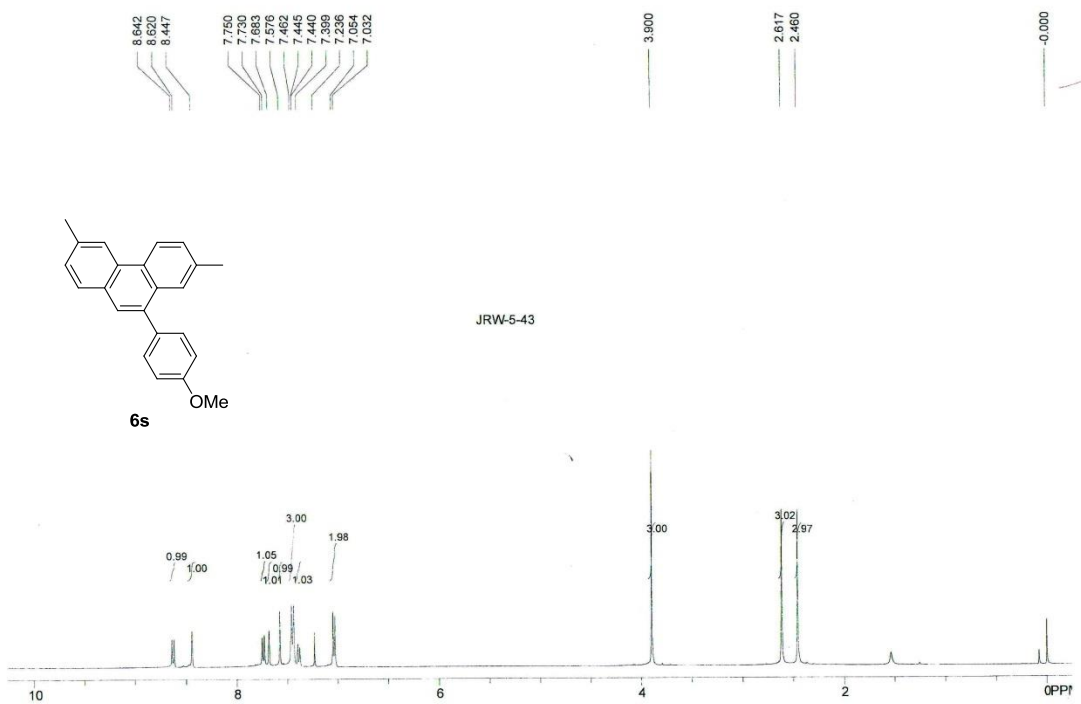

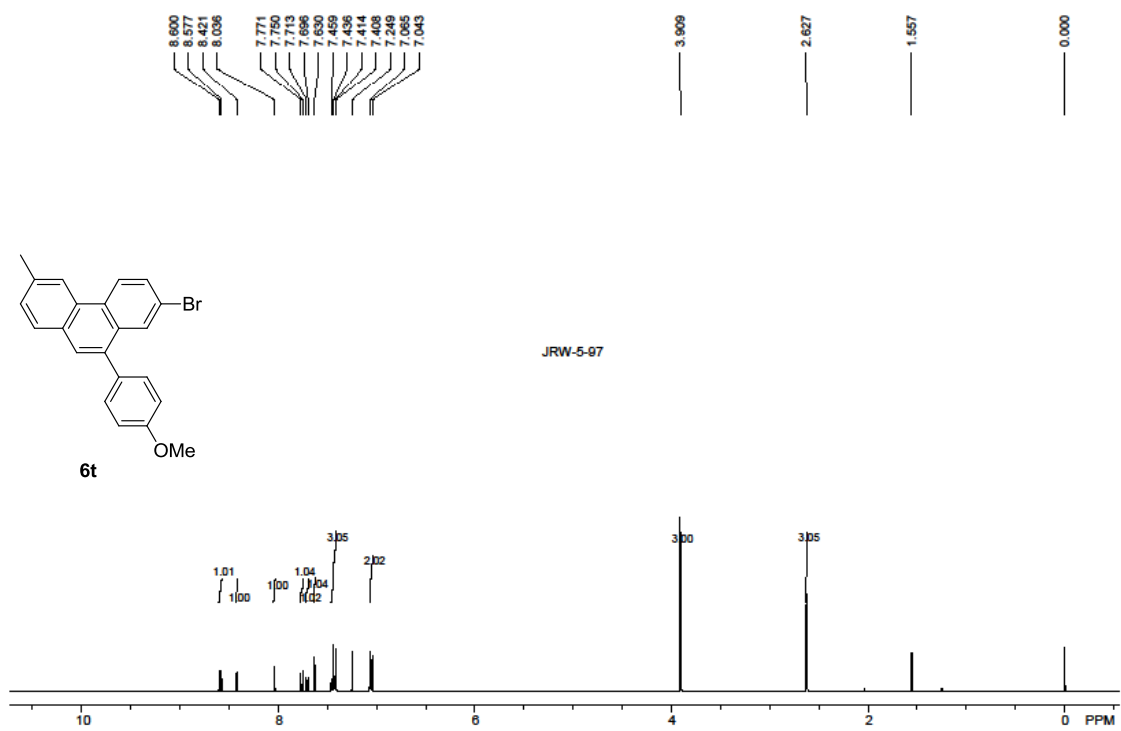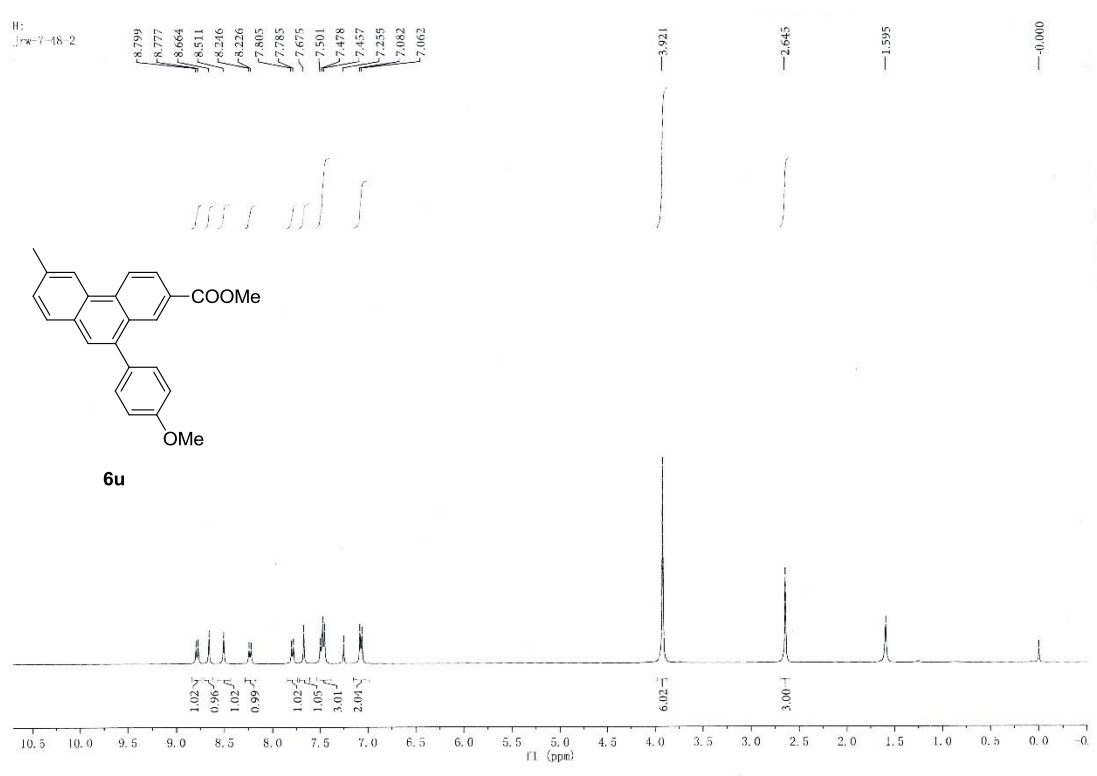

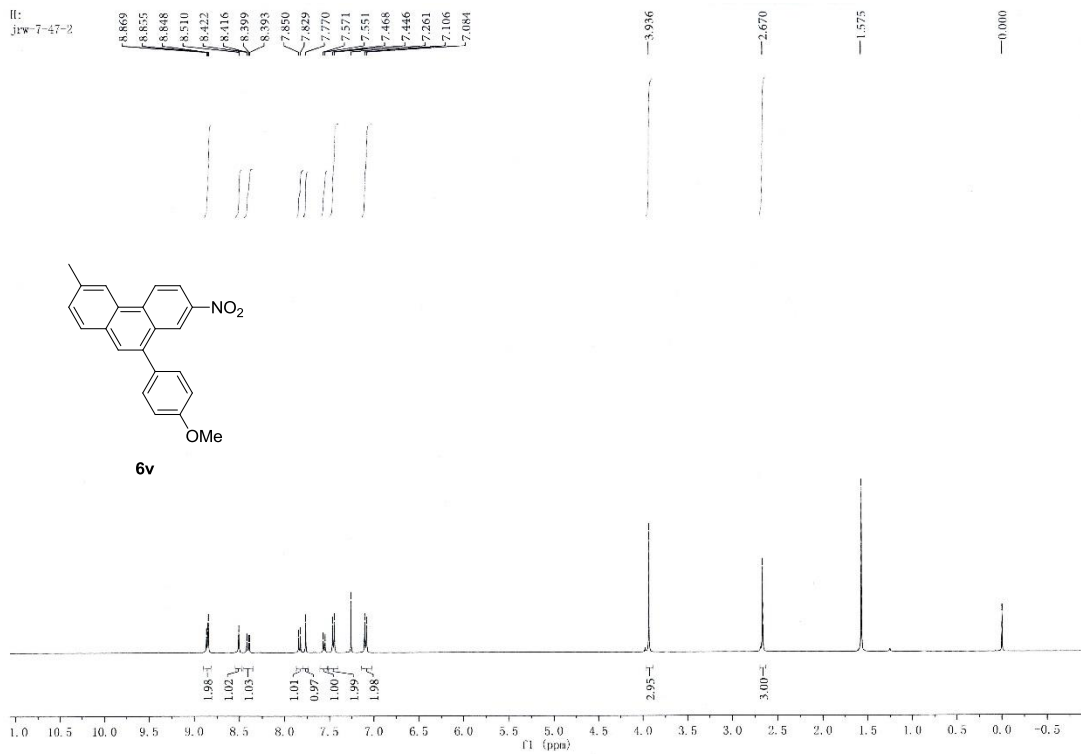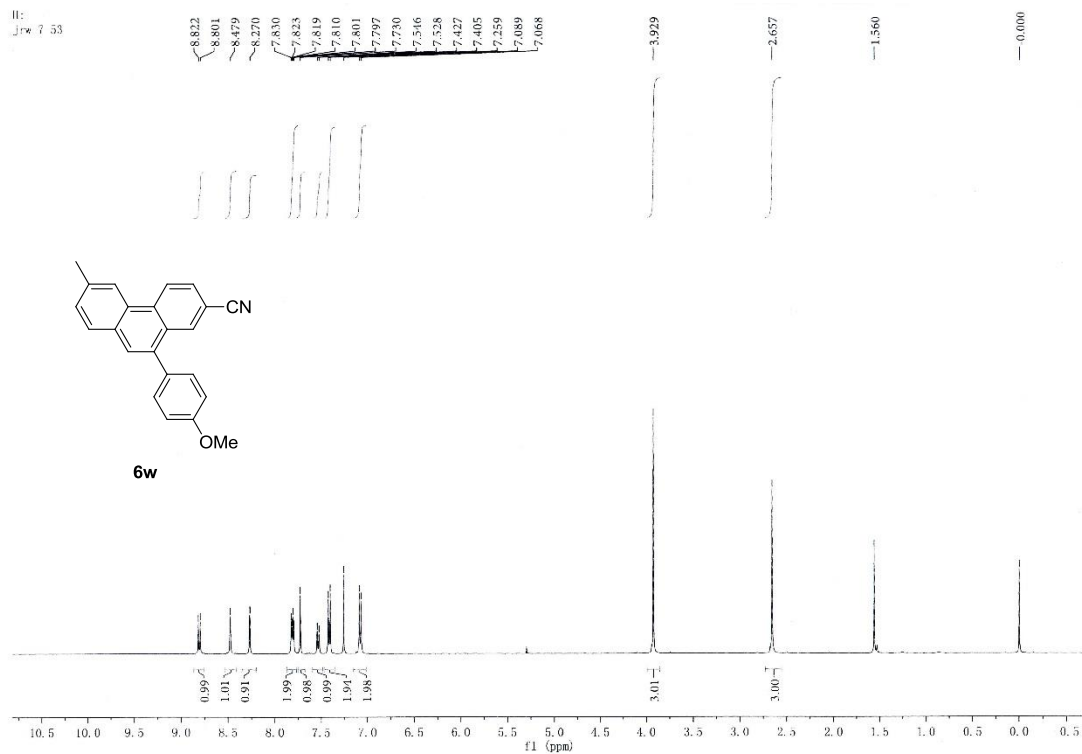

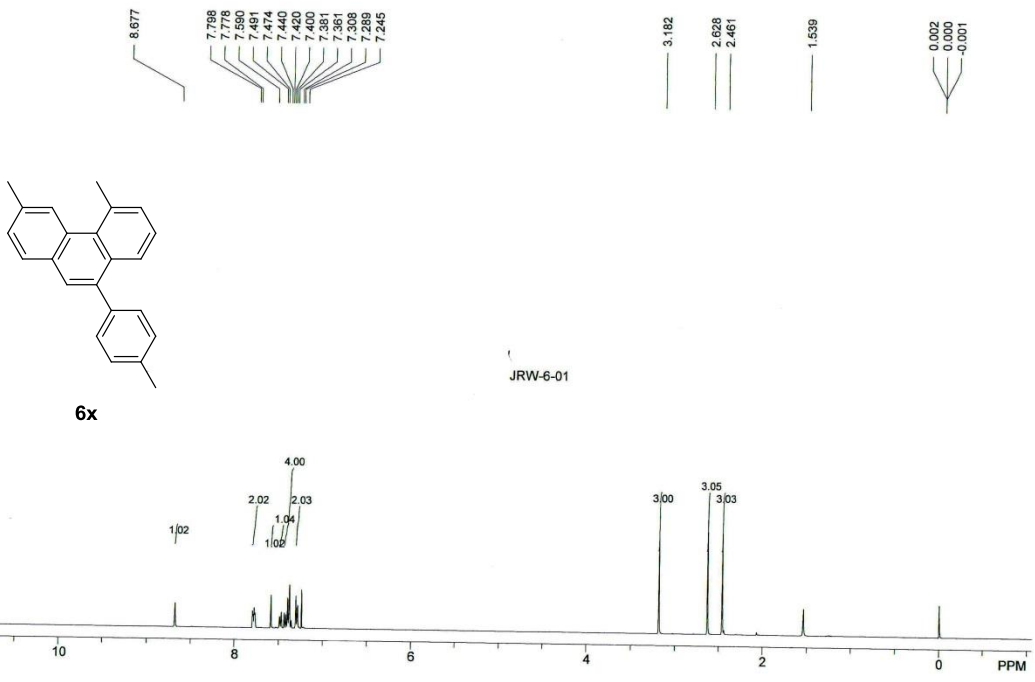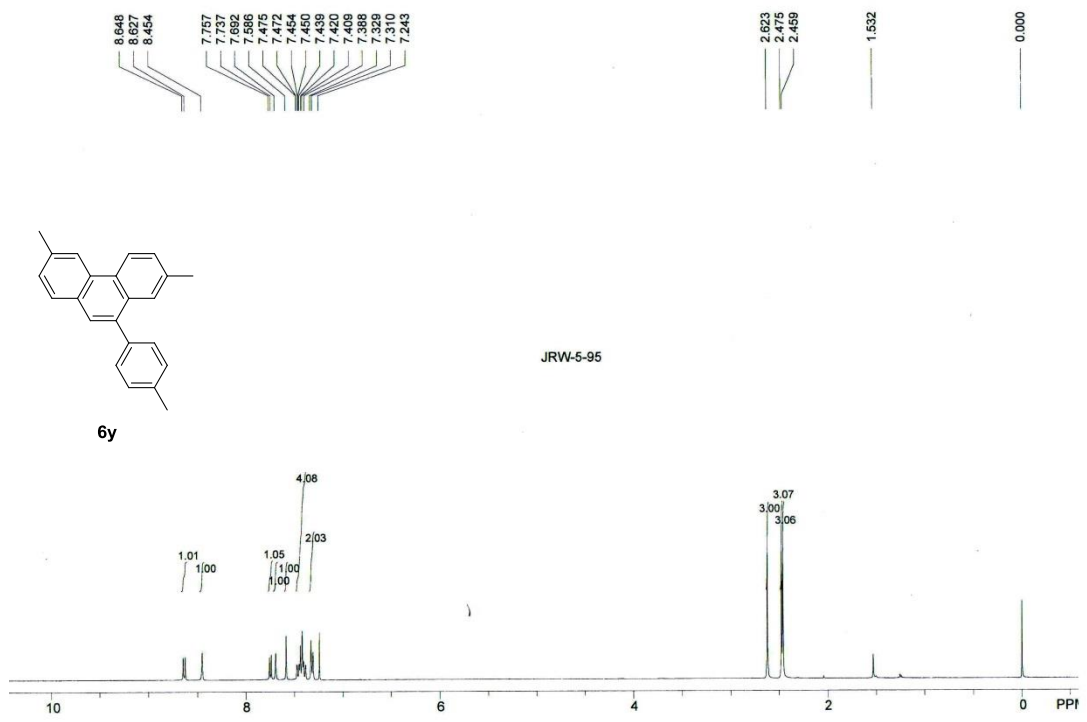

Desktop  
750h

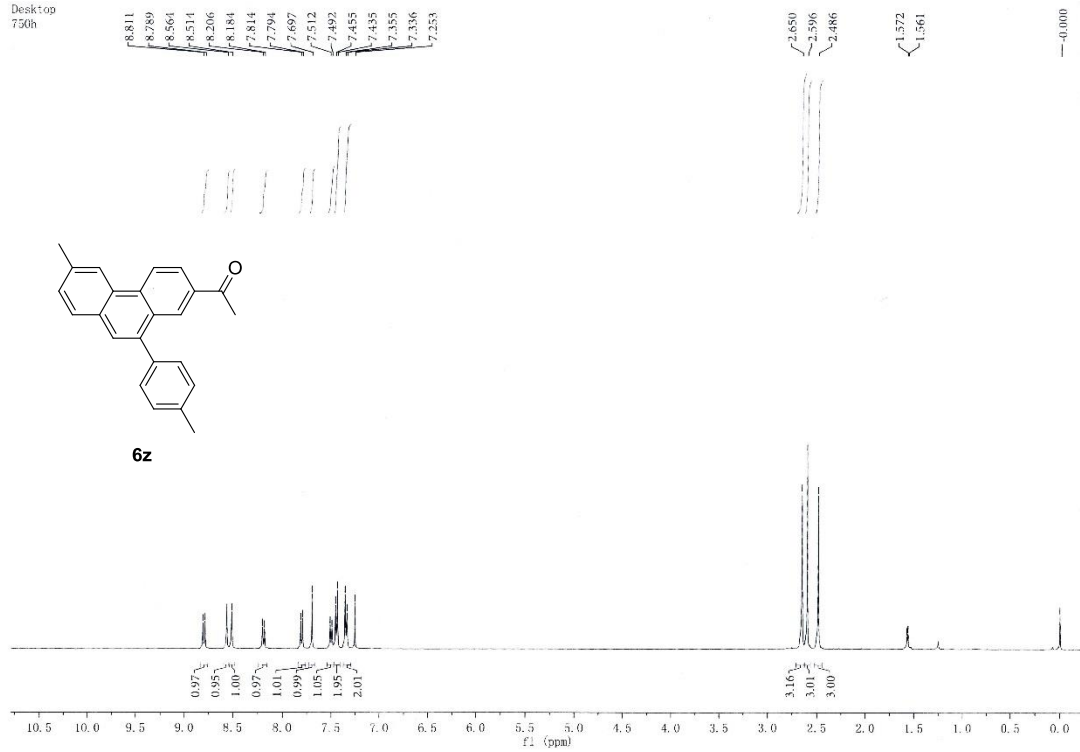

Desktop  
750C

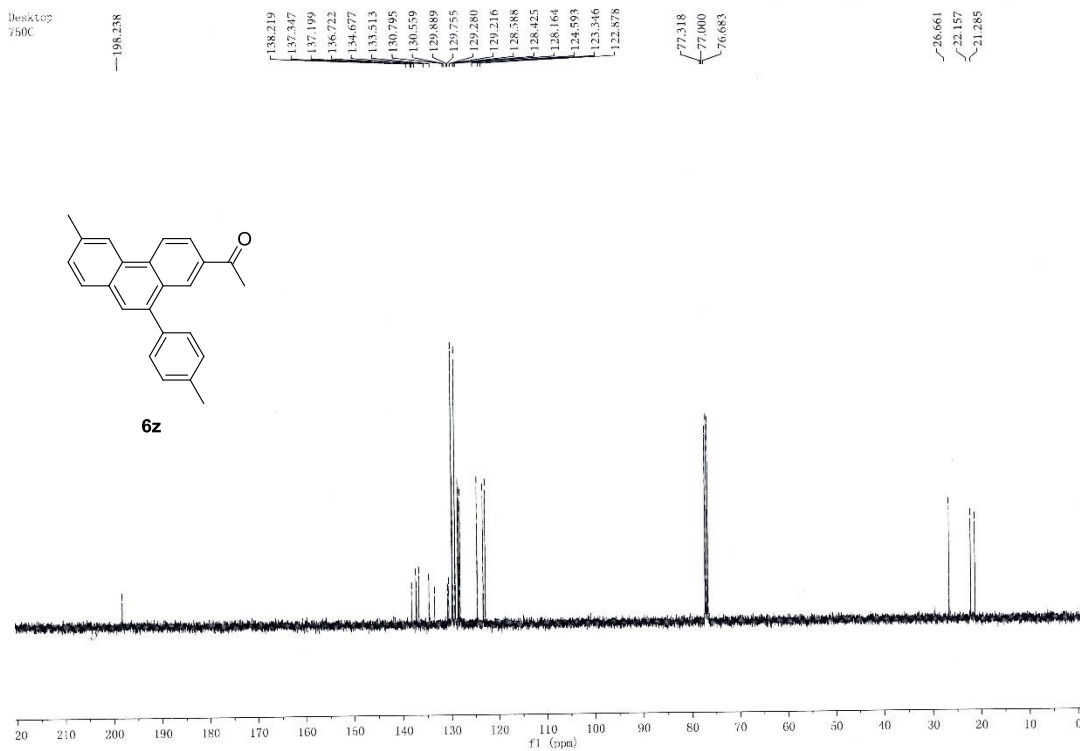

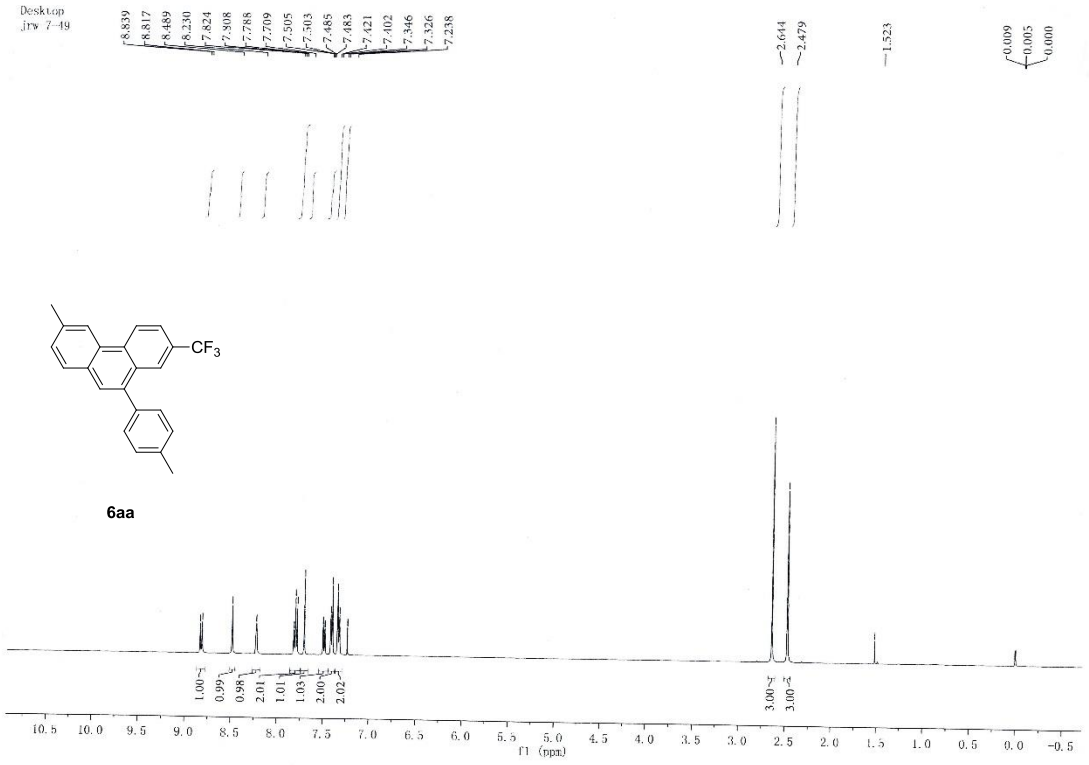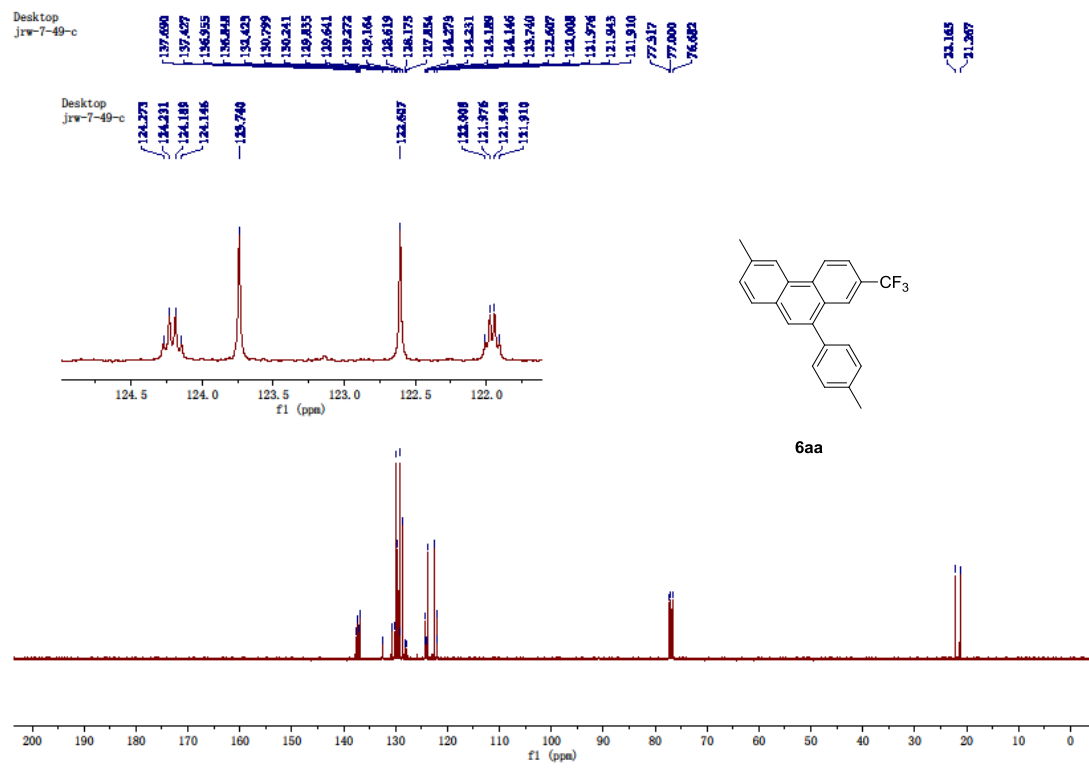

DeskTop  
749F

61.801

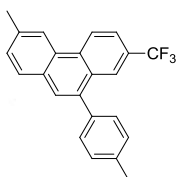

**6aa**

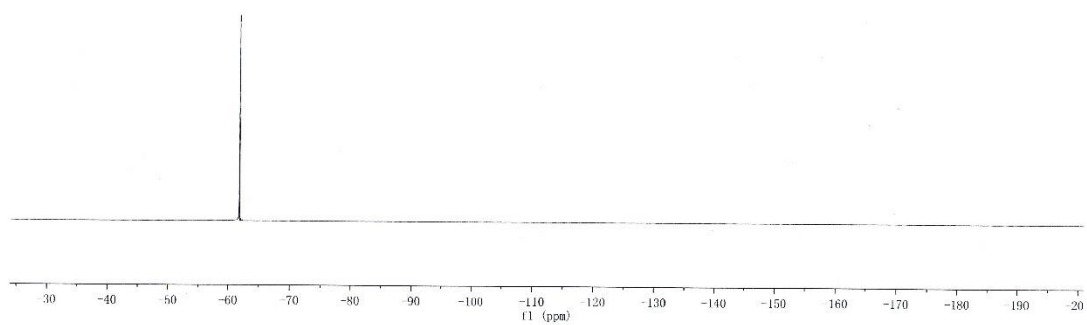



## References:

- (1) W. Liu, J. Chen, R. Jin, D. Xu, Y. Li, F. Ba, G. Gu, Y. Kuang and H. Guo, *Org. Chem. Front.*, 2016, **3**, 852-855.
- (2) D. Xu, R. Jin, W. Liu, F. Ba, Y. Li, A. Ding and H. Guo, *Tetrahedron Lett.*, 2016, **57**, 3235-3238.
- (3) S. Watanabe, K. Yamamoto, Y. Itagaki, T. Iwamura and T. Kataoka, *Tetrahedron*, 2000, **56**, 855-863.
- (4) M. Hartmann, C. G. Daniliuc and A. Studer, *Chem. Commun.*, 2015, **51**, 3121-3123.
- (5) D. Garc ía-Cuadrado, P. de Mendoza, A. A. C. Braga, F. Maseras and A. M. Echavarren, *J. Am. Chem. Soc.*, 2007, **129**, 6880-6886.
